# Supplementary material
Source: MDPI journal article supplement (https://www.mdpi.com/2504-3110/7/10/702)
Supplement: s1 [file s1]

# A fractional ( $q, q'$ ) non-extensive information dimension of for complex networks

## Barabasi-Albert Networks

The Barabasi-Albert (BA) model generated 225 networks, as listed in Table S1. The model was tuned using the total nodes ( $n$ ) of the network, the initial nodes ( $n_0$ ), and the average node degree ( $ad$ ). The network name is given following the pattern BA- $n$ - $n_0$ - $ad$ ; for example, BA-3500-8-4 denotes a network with 3500 nodes that was generated using 8 initial nodes with an average node degree of 4.

**Table S1.** The SBICR,  $d_I$ ,  $d_{q,q'}$ ,  $q$ , and  $q'$  values for the information model Eq. (10) and the fractional ( $q, q'$ ) information model Eq. (12) on BA networks.

| Network      | Nodes | Edges | $SBICR_I$ | $SBICR_{(q,q')}$ | $d_I$ | $d_{q,q'}$ | $q$   | $q'$         |
|--------------|-------|-------|-----------|------------------|-------|------------|-------|--------------|
| BA-2000-10-1 | 2000  | 2779  | -66.469   | -61.918          | 4.092 | 1.506      | 1.365 | <b>1.003</b> |
| BA-2000-10-2 | 2000  | 4244  | -45.812   | -41.061          | 4.585 | 1.471      | 1.394 | 0.998        |
| BA-2000-10-3 | 2000  | 6056  | -35.015   | -30.950          | 4.966 | 1.492      | 1.406 | 0.996        |
| BA-2000-10-4 | 2000  | 8012  | -29.250   | -25.619          | 5.250 | 1.490      | 1.419 | 0.995        |
| BA-2000-10-5 | 2000  | 9996  | -29.144   | -25.289          | 6.038 | 1.572      | 1.494 | 0.997        |
| BA-2000-10-6 | 2000  | 11986 | -22.879   | -19.331          | 5.653 | 1.403      | 1.447 | 0.994        |
| BA-2000-10-7 | 2000  | 13975 | -23.357   | -20.219          | 6.531 | 1.701      | 1.489 | 0.993        |
| BA-2000-10-8 | 2000  | 15965 | -23.335   | -20.339          | 6.964 | 1.729      | 1.531 | 0.997        |
| BA-2000-10-9 | 2000  | 17955 | -13.803   | -10.303          | 4.782 | 0.864      | 1.404 | 0.996        |
| BA-2000-2-1  | 2000  | 2701  | -77.869   | -71.848          | 4.045 | 1.562      | 1.345 | <b>1.003</b> |
| BA-2000-3-1  | 2000  | 2724  | -81.969   | -75.237          | 3.984 | 1.466      | 1.355 | <b>1.010</b> |
| BA-2000-3-2  | 2000  | 4191  | -46.109   | -41.367          | 4.552 | 1.475      | 1.387 | 0.998        |
| BA-2000-4-1  | 2000  | 2703  | -81.489   | -75.059          | 3.930 | 1.436      | 1.358 | <b>1.007</b> |
| BA-2000-4-2  | 2000  | 4162  | -45.961   | -41.318          | 4.549 | 1.470      | 1.386 | 0.998        |
| BA-2000-4-3  | 2000  | 6042  | -35.118   | -31.088          | 4.876 | 1.449      | 1.404 | 0.996        |
| BA-2000-5-1  | 2000  | 2685  | -74.896   | -69.654          | 3.973 | 1.493      | 1.356 | <b>1.002</b> |
| BA-2000-5-2  | 2000  | 4223  | -45.960   | -41.193          | 4.581 | 1.483      | 1.390 | 0.997        |
| BA-2000-5-3  | 2000  | 6040  | -35.120   | -31.005          | 4.924 | 1.459      | 1.411 | 0.996        |
| BA-2000-5-4  | 2000  | 7998  | -29.358   | -25.729          | 5.259 | 1.484      | 1.423 | 0.995        |
| BA-2000-6-1  | 2000  | 2799  | -71.407   | -66.250          | 4.132 | 1.533      | 1.361 | <b>1.004</b> |
| BA-2000-6-2  | 2000  | 4245  | -46.049   | -41.268          | 4.561 | 1.473      | 1.388 | 0.998        |
| BA-2000-6-3  | 2000  | 6054  | -35.194   | -31.101          | 4.900 | 1.453      | 1.408 | 0.996        |
| BA-2000-6-4  | 2000  | 7998  | -29.256   | -25.561          | 5.233 | 1.475      | 1.423 | 0.995        |
| BA-2000-6-5  | 2000  | 9986  | -29.246   | -25.444          | 6.001 | 1.561      | 1.491 | 0.997        |
| BA-2000-7-1  | 2000  | 2751  | -69.422   | -64.546          | 4.084 | 1.521      | 1.359 | <b>1.003</b> |
| BA-2000-7-2  | 2000  | 4216  | -46.066   | -41.268          | 4.535 | 1.456      | 1.390 | 0.997        |
| BA-2000-7-3  | 2000  | 6052  | -35.095   | -31.011          | 4.954 | 1.469      | 1.410 | 0.996        |
| BA-2000-7-4  | 2000  | 7998  | -29.227   | -25.567          | 5.196 | 1.464      | 1.420 | 0.995        |
| BA-2000-7-5  | 2000  | 9989  | -29.194   | -25.355          | 6.025 | 1.568      | 1.492 | 0.997        |
| BA-2000-7-6  | 2000  | 11979 | -22.896   | -19.412          | 5.709 | 1.435      | 1.443 | 0.994        |
| BA-2000-8-1  | 2000  | 2781  | -69.594   | -64.366          | 4.126 | 1.519      | 1.368 | <b>1.004</b> |
| BA-2000-8-2  | 2000  | 4214  | -45.430   | -40.750          | 4.564 | 1.456      | 1.394 | 0.997        |

| Network      | Nodes | Edges | $SBICR_I$ | $SBICR_{(q,q')}$ | $d_I$ | $d_{q,q'}$ | $q$   | $q'$         |
|--------------|-------|-------|-----------|------------------|-------|------------|-------|--------------|
| BA-2000-8-3  | 2000  | 6041  | -35.130   | -31.043          | 4.937 | 1.462      | 1.412 | 0.996        |
| BA-2000-8-4  | 2000  | 8015  | -29.252   | -25.540          | 5.222 | 1.468      | 1.422 | 0.995        |
| BA-2000-8-5  | 2000  | 9988  | -29.190   | -25.300          | 6.041 | 1.565      | 1.497 | 0.997        |
| BA-2000-8-6  | 2000  | 11980 | -22.899   | -19.305          | 5.664 | 1.393      | 1.449 | 0.993        |
| BA-2000-8-7  | 2000  | 13972 | -23.375   | -20.164          | 6.482 | 1.664      | 1.494 | 0.993        |
| BA-2000-9-1  | 2000  | 2763  | -72.528   | -65.485          | 4.055 | 1.474      | 1.368 | <b>1.010</b> |
| BA-2000-9-2  | 2000  | 4221  | -45.743   | -41.101          | 4.571 | 1.472      | 1.389 | 0.998        |
| BA-2000-9-3  | 2000  | 6047  | -35.091   | -30.980          | 4.949 | 1.464      | 1.413 | 0.996        |
| BA-2000-9-4  | 2000  | 8008  | -29.229   | -25.554          | 5.225 | 1.474      | 1.421 | 0.995        |
| BA-2000-9-5  | 2000  | 9993  | -29.131   | -25.308          | 6.066 | 1.605      | 1.486 | 0.997        |
| BA-2000-9-6  | 2000  | 11982 | -22.916   | -19.394          | 5.672 | 1.417      | 1.444 | 0.993        |
| BA-2000-9-7  | 2000  | 13973 | -23.469   | -20.347          | 6.531 | 1.707      | 1.487 | 0.994        |
| BA-2000-9-8  | 2000  | 15964 | -23.321   | -20.317          | 6.954 | 1.711      | 1.534 | 0.998        |
| BA-3000-10-1 | 3000  | 4165  | -70.427   | -64.996          | 4.324 | 1.541      | 1.361 | <b>1.002</b> |
| BA-3000-10-2 | 3000  | 6365  | -47.296   | -42.116          | 4.621 | 1.382      | 1.388 | 0.998        |
| BA-3000-10-3 | 3000  | 9097  | -36.074   | -31.568          | 4.840 | 1.326      | 1.401 | 0.996        |
| BA-3000-10-4 | 3000  | 12017 | -29.922   | -25.712          | 5.004 | 1.282      | 1.405 | 0.996        |
| BA-3000-10-5 | 3000  | 14998 | -30.372   | -26.375          | 6.088 | 1.543      | 1.472 | 0.997        |
| BA-3000-10-6 | 3000  | 17985 | -23.070   | -18.850          | 5.226 | 1.126      | 1.422 | 0.996        |
| BA-3000-10-7 | 3000  | 20975 | -23.827   | -20.036          | 6.239 | 1.449      | 1.468 | 0.994        |
| BA-3000-10-8 | 3000  | 23965 | -24.155   | -20.717          | 6.966 | 1.667      | 1.513 | 0.994        |
| BA-3000-10-9 | 3000  | 26955 | -24.038   | -20.728          | 7.363 | 1.699      | 1.540 | 0.998        |
| BA-3000-2-1  | 3000  | 4121  | -80.308   | -73.839          | 4.164 | 1.466      | 1.356 | <b>1.001</b> |
| BA-3000-3-1  | 3000  | 4067  | -85.249   | -78.052          | 4.229 | 1.510      | 1.359 | <b>1.005</b> |
| BA-3000-3-2  | 3000  | 6306  | -47.640   | -42.380          | 4.508 | 1.347      | 1.383 | 0.997        |
| BA-3000-4-1  | 3000  | 4112  | -89.723   | -81.642          | 4.185 | 1.495      | 1.368 | <b>1.005</b> |
| BA-3000-4-2  | 3000  | 6301  | -47.430   | -42.204          | 4.481 | 1.340      | 1.379 | 0.997        |
| BA-3000-4-3  | 3000  | 9052  | -36.002   | -31.547          | 4.765 | 1.298      | 1.396 | 0.997        |
| BA-3000-5-1  | 3000  | 4105  | -85.077   | -77.855          | 4.229 | 1.466      | 1.368 | <b>1.008</b> |
| BA-3000-5-2  | 3000  | 6275  | -47.438   | -42.300          | 4.472 | 1.349      | 1.376 | 0.998        |
| BA-3000-5-3  | 3000  | 9062  | -36.071   | -31.567          | 4.815 | 1.323      | 1.398 | 0.997        |
| BA-3000-5-4  | 3000  | 12009 | -29.816   | -25.547          | 4.967 | 1.260      | 1.405 | 0.996        |
| BA-3000-6-1  | 3000  | 4049  | -82.091   | -75.163          | 4.176 | 1.507      | 1.357 | <b>1.003</b> |
| BA-3000-6-2  | 3000  | 6315  | -47.511   | -42.281          | 4.524 | 1.358      | 1.383 | 0.998        |
| BA-3000-6-3  | 3000  | 9066  | -36.049   | -31.540          | 4.818 | 1.333      | 1.396 | 0.996        |
| BA-3000-6-4  | 3000  | 12010 | -29.850   | -25.593          | 4.960 | 1.267      | 1.405 | 0.996        |
| BA-3000-6-5  | 3000  | 14986 | -30.307   | -26.312          | 6.081 | 1.542      | 1.471 | 0.997        |
| BA-3000-7-1  | 3000  | 4103  | -78.489   | -72.525          | 4.251 | 1.536      | 1.355 | <b>1.003</b> |
| BA-3000-7-2  | 3000  | 6277  | -47.365   | -42.138          | 4.507 | 1.342      | 1.385 | 0.997        |
| BA-3000-7-3  | 3000  | 9068  | -36.023   | -31.540          | 4.779 | 1.306      | 1.398 | 0.997        |
| BA-3000-7-4  | 3000  | 12002 | -29.921   | -25.646          | 5.002 | 1.259      | 1.413 | 0.996        |
| BA-3000-7-5  | 3000  | 14986 | -30.343   | -26.382          | 6.071 | 1.548      | 1.467 | 0.997        |
| BA-3000-7-6  | 3000  | 17979 | -22.976   | -18.643          | 5.150 | 1.079      | 1.426 | 0.996        |
| BA-3000-8-1  | 3000  | 4176  | -73.343   | -67.607          | 4.336 | 1.581      | 1.351 | <b>1.002</b> |
| BA-3000-8-2  | 3000  | 6340  | -47.464   | -42.239          | 4.592 | 1.375      | 1.389 | 0.998        |
| BA-3000-8-3  | 3000  | 9090  | -35.989   | -31.502          | 4.873 | 1.345      | 1.398 | 0.996        |

| Network      | Nodes | Edges | $SBICR_I$ | $SBICR_{(q,q')}$ | $d_I$ | $d_{q,q'}$ | $q$   | $q'$         |
|--------------|-------|-------|-----------|------------------|-------|------------|-------|--------------|
| BA-3000-8-4  | 3000  | 12005 | -29.911   | -25.687          | 4.975 | 1.266      | 1.406 | 0.996        |
| BA-3000-8-5  | 3000  | 14990 | -30.339   | -26.366          | 6.054 | 1.538      | 1.469 | 0.997        |
| BA-3000-8-6  | 3000  | 17981 | -23.176   | -18.960          | 5.252 | 1.129      | 1.428 | 0.996        |
| BA-3000-8-7  | 3000  | 20972 | -23.948   | -20.185          | 6.275 | 1.463      | 1.470 | 0.994        |
| BA-3000-9-1  | 3000  | 4130  | -75.378   | -68.846          | 4.244 | 1.514      | 1.365 | <b>1.002</b> |
| BA-3000-9-2  | 3000  | 6319  | -47.371   | -42.123          | 4.544 | 1.367      | 1.384 | 0.998        |
| BA-3000-9-3  | 3000  | 9065  | -36.025   | -31.518          | 4.825 | 1.315      | 1.402 | 0.997        |
| BA-3000-9-4  | 3000  | 12015 | -29.887   | -25.670          | 4.966 | 1.260      | 1.406 | 0.996        |
| BA-3000-9-5  | 3000  | 14997 | -30.399   | -26.404          | 6.058 | 1.521      | 1.473 | 0.997        |
| BA-3000-9-6  | 3000  | 17984 | -23.056   | -18.850          | 5.211 | 1.121      | 1.421 | 0.996        |
| BA-3000-9-7  | 3000  | 20973 | -23.831   | -20.042          | 6.251 | 1.451      | 1.470 | 0.994        |
| BA-3000-9-8  | 3000  | 23964 | -24.152   | -20.745          | 6.948 | 1.670      | 1.504 | 0.995        |
| BA-3500-10-1 | 3500  | 4787  | -85.739   | -76.844          | 4.180 | 1.381      | 1.391 | <b>1.008</b> |
| BA-3500-10-2 | 3500  | 7377  | -47.604   | -42.211          | 4.612 | 1.361      | 1.382 | 0.998        |
| BA-3500-10-3 | 3500  | 10604 | -42.782   | -37.299          | 5.495 | 1.477      | 1.450 | 0.999        |
| BA-3500-10-4 | 3500  | 14022 | -30.112   | -25.680          | 4.869 | 1.191      | 1.400 | 0.997        |
| BA-3500-10-5 | 3500  | 17498 | -30.763   | -26.614          | 6.050 | 1.502      | 1.466 | 0.997        |
| BA-3500-10-6 | 3500  | 20985 | -23.109   | -18.589          | 5.000 | 1.001      | 1.420 | 0.997        |
| BA-3500-10-7 | 3500  | 24475 | -23.991   | -19.945          | 6.087 | 1.340      | 1.461 | 0.995        |
| BA-3500-10-8 | 3500  | 27965 | -24.419   | -20.754          | 6.906 | 1.599      | 1.502 | 0.995        |
| BA-3500-10-9 | 3500  | 31455 | -24.420   | -20.965          | 7.412 | 1.693      | 1.534 | 0.998        |
| BA-3500-2-1  | 3500  | 4762  | -81.989   | -75.090          | 4.259 | 1.513      | 1.348 | <b>1.001</b> |
| BA-3500-3-1  | 3500  | 4821  | -96.631   | -86.826          | 4.228 | 1.407      | 1.380 | <b>1.013</b> |
| BA-3500-3-2  | 3500  | 7375  | -54.217   | -48.006          | 4.899 | 1.430      | 1.414 | <b>1.000</b> |
| BA-3500-4-1  | 3500  | 4767  | -90.652   | -82.469          | 4.252 | 1.490      | 1.367 | <b>1.005</b> |
| BA-3500-4-2  | 3500  | 7334  | -47.951   | -42.513          | 4.512 | 1.325      | 1.379 | 0.998        |
| BA-3500-4-3  | 3500  | 10588 | -42.801   | -37.381          | 5.491 | 1.501      | 1.441 | 0.999        |
| BA-3500-5-1  | 3500  | 4818  | -88.698   | -80.496          | 4.212 | 1.450      | 1.374 | <b>1.004</b> |
| BA-3500-5-2  | 3500  | 7361  | -48.062   | -42.697          | 4.552 | 1.339      | 1.380 | 0.998        |
| BA-3500-5-3  | 3500  | 10577 | -36.206   | -31.533          | 4.723 | 1.258      | 1.390 | 0.997        |
| BA-3500-5-4  | 3500  | 14000 | -30.051   | -25.539          | 4.847 | 1.175      | 1.400 | 0.996        |
| BA-3500-6-1  | 3500  | 4770  | -85.417   | -77.802          | 4.328 | 1.507      | 1.365 | <b>1.006</b> |
| BA-3500-6-2  | 3500  | 7324  | -47.863   | -42.446          | 4.454 | 1.304      | 1.376 | 0.998        |
| BA-3500-6-3  | 3500  | 10585 | -36.260   | -31.551          | 4.732 | 1.248      | 1.394 | 0.997        |
| BA-3500-6-4  | 3500  | 14000 | -30.007   | -25.514          | 4.869 | 1.189      | 1.400 | 0.997        |
| BA-3500-6-5  | 3500  | 17487 | -30.763   | -26.645          | 6.057 | 1.511      | 1.465 | 0.997        |
| BA-3500-7-1  | 3500  | 4813  | -84.680   | -77.075          | 4.315 | 1.534      | 1.361 | <b>1.003</b> |
| BA-3500-7-2  | 3500  | 7352  | -47.816   | -42.376          | 4.525 | 1.321      | 1.382 | 0.998        |
| BA-3500-7-3  | 3500  | 10596 | -36.204   | -31.450          | 4.732 | 1.243      | 1.396 | 0.997        |
| BA-3500-7-4  | 3500  | 14014 | -30.058   | -25.519          | 4.844 | 1.160      | 1.404 | 0.997        |
| BA-3500-7-5  | 3500  | 17487 | -30.716   | -26.647          | 6.054 | 1.509      | 1.466 | 0.996        |
| BA-3500-7-6  | 3500  | 20979 | -23.085   | -18.612          | 5.049 | 1.028      | 1.415 | 0.997        |
| BA-3500-8-1  | 3500  | 4783  | -83.015   | -76.172          | 4.296 | 1.490      | 1.368 | <b>1.005</b> |
| BA-3500-8-2  | 3500  | 7357  | -47.918   | -42.588          | 4.542 | 1.335      | 1.380 | 0.998        |
| BA-3500-8-3  | 3500  | 10582 | -36.219   | -31.565          | 4.715 | 1.235      | 1.391 | 0.997        |
| BA-3500-8-4  | 3500  | 14014 | -36.867   | -31.683          | 5.902 | 1.508      | 1.469 | 0.998        |

| Network      | Nodes | Edges | $SBICR_I$ | $SBICR_{(q,q')}$ | $d_I$ | $d_{q,q'}$ | $q$   | $q'$         |
|--------------|-------|-------|-----------|------------------|-------|------------|-------|--------------|
| BA-3500-8-5  | 3500  | 17490 | -30.779   | -26.698          | 6.062 | 1.523      | 1.463 | 0.997        |
| BA-3500-8-6  | 3500  | 20980 | -23.165   | -18.686          | 5.054 | 1.024      | 1.419 | 0.997        |
| BA-3500-8-7  | 3500  | 24472 | -24.019   | -19.968          | 6.090 | 1.340      | 1.460 | 0.995        |
| BA-3500-9-1  | 3500  | 4852  | -78.261   | -71.903          | 4.387 | 1.556      | 1.361 | <b>1.003</b> |
| BA-3500-9-2  | 3500  | 7384  | -47.670   | -42.259          | 4.566 | 1.334      | 1.384 | 0.998        |
| BA-3500-9-3  | 3500  | 10598 | -36.267   | -31.552          | 4.722 | 1.244      | 1.396 | 0.997        |
| BA-3500-9-4  | 3500  | 14013 | -30.083   | -25.636          | 4.877 | 1.186      | 1.401 | 0.997        |
| BA-3500-9-5  | 3500  | 17494 | -30.758   | -26.631          | 6.040 | 1.499      | 1.467 | 0.997        |
| BA-3500-9-6  | 3500  | 20982 | -23.066   | -18.486          | 4.997 | 0.984      | 1.422 | 0.997        |
| BA-3500-9-7  | 3500  | 24473 | -24.027   | -19.954          | 6.107 | 1.339      | 1.464 | 0.995        |
| BA-3500-9-8  | 3500  | 27964 | -24.372   | -20.694          | 6.897 | 1.596      | 1.499 | 0.994        |
| BA-4000-10-1 | 4000  | 5538  | -82.604   | -74.769          | 4.373 | 1.492      | 1.372 | <b>1.005</b> |
| BA-4000-10-2 | 4000  | 8415  | -54.046   | -47.843          | 4.945 | 1.422      | 1.413 | 1.000        |
| BA-4000-10-3 | 4000  | 12110 | -43.126   | -37.560          | 5.471 | 1.467      | 1.438 | 0.999        |
| BA-4000-10-4 | 4000  | 16016 | -37.191   | -31.912          | 5.920 | 1.481      | 1.468 | 0.998        |
| BA-4000-10-5 | 4000  | 19997 | -31.073   | -26.905          | 6.029 | 1.483      | 1.459 | 0.997        |
| BA-4000-10-6 | 4000  | 23985 | -23.054   | -18.317          | 4.860 | 0.929      | 1.411 | 0.997        |
| BA-4000-10-7 | 4000  | 27975 | -24.049   | -19.741          | 5.925 | 1.227      | 1.456 | 0.996        |
| BA-4000-10-8 | 4000  | 31965 | -24.566   | -20.688          | 6.813 | 1.527      | 1.495 | 0.995        |
| BA-4000-10-9 | 4000  | 35955 | -24.676   | -21.096          | 7.382 | 1.676      | 1.524 | 0.997        |
| BA-4000-2-1  | 4000  | 5372  | -92.077   | -83.762          | 4.325 | 1.504      | 1.363 | <b>1.004</b> |
| BA-4000-3-1  | 4000  | 5544  | -92.533   | -83.606          | 4.354 | 1.507      | 1.367 | <b>1.004</b> |
| BA-4000-3-2  | 4000  | 8427  | -54.803   | -48.509          | 4.899 | 1.422      | 1.404 | 1.000        |
| BA-4000-4-1  | 4000  | 5427  | -91.977   | -83.580          | 4.262 | 1.438      | 1.364 | <b>1.006</b> |
| BA-4000-4-2  | 4000  | 8398  | -54.591   | -48.328          | 4.898 | 1.403      | 1.411 | 0.999        |
| BA-4000-4-3  | 4000  | 12085 | -43.251   | -37.650          | 5.450 | 1.451      | 1.439 | 0.999        |
| BA-4000-5-1  | 4000  | 5452  | -86.568   | -78.858          | 4.351 | 1.515      | 1.359 | <b>1.002</b> |
| BA-4000-5-2  | 4000  | 8381  | -54.725   | -48.415          | 4.926 | 1.414      | 1.412 | 1.000        |
| BA-4000-5-3  | 4000  | 12093 | -36.483   | -31.539          | 4.652 | 1.178      | 1.395 | 0.997        |
| BA-4000-5-4  | 4000  | 16007 | -30.133   | -25.401          | 4.790 | 1.116      | 1.398 | 0.997        |
| BA-4000-6-1  | 4000  | 5486  | -90.763   | -82.548          | 4.331 | 1.455      | 1.373 | <b>1.008</b> |
| BA-4000-6-2  | 4000  | 8400  | -54.687   | -48.431          | 4.935 | 1.430      | 1.407 | 1.000        |
| BA-4000-6-3  | 4000  | 12079 | -36.528   | -31.657          | 4.639 | 1.198      | 1.386 | 0.997        |
| BA-4000-6-4  | 4000  | 16006 | -37.204   | -31.987          | 5.923 | 1.488      | 1.465 | 0.998        |
| BA-4000-6-5  | 4000  | 19991 | -31.054   | -26.863          | 6.032 | 1.495      | 1.458 | 0.996        |
| BA-4000-7-1  | 4000  | 5455  | -90.334   | -81.650          | 4.333 | 1.440      | 1.376 | <b>1.010</b> |
| BA-4000-7-2  | 4000  | 8362  | -48.334   | -42.747          | 4.459 | 1.277      | 1.375 | 0.998        |
| BA-4000-7-3  | 4000  | 12108 | -36.409   | -31.540          | 4.671 | 1.194      | 1.390 | 0.997        |
| BA-4000-7-4  | 4000  | 16002 | -30.104   | -25.395          | 4.772 | 1.113      | 1.397 | 0.997        |
| BA-4000-7-5  | 4000  | 19994 | -31.032   | -26.845          | 6.012 | 1.484      | 1.456 | 0.997        |
| BA-4000-7-6  | 4000  | 23979 | -23.085   | -18.394          | 4.898 | 0.944      | 1.412 | 0.997        |
| BA-4000-8-1  | 4000  | 5447  | -78.487   | -72.253          | 4.420 | 1.561      | 1.354 | <b>1.002</b> |
| BA-4000-8-2  | 4000  | 8417  | -48.241   | -42.633          | 4.506 | 1.295      | 1.377 | 0.998        |
| BA-4000-8-3  | 4000  | 12085 | -43.257   | -37.729          | 5.474 | 1.460      | 1.439 | 0.999        |
| BA-4000-8-4  | 4000  | 16024 | -30.190   | -25.499          | 4.783 | 1.127      | 1.396 | 0.997        |
| BA-4000-8-5  | 4000  | 19992 | -31.097   | -26.868          | 5.992 | 1.464      | 1.461 | 0.997        |

| Network      | Nodes | Edges | $SBICR_I$ | $SBICR_{(q,q')}$ | $d_I$ | $d_{q,q'}$ | $q$   | $q'$         |
|--------------|-------|-------|-----------|------------------|-------|------------|-------|--------------|
| BA-4000-8-6  | 4000  | 23980 | -23.034   | -18.271          | 4.827 | 0.913      | 1.412 | 0.997        |
| BA-4000-8-7  | 4000  | 27972 | -24.065   | -19.766          | 5.944 | 1.241      | 1.455 | 0.996        |
| BA-4000-9-1  | 4000  | 5537  | -83.005   | -76.146          | 4.348 | 1.466      | 1.374 | <b>1.003</b> |
| BA-4000-9-2  | 4000  | 8462  | -48.062   | -42.598          | 4.512 | 1.291      | 1.377 | 0.998        |
| BA-4000-9-3  | 4000  | 12098 | -43.132   | -37.554          | 5.492 | 1.461      | 1.441 | 0.999        |
| BA-4000-9-4  | 4000  | 16010 | -37.173   | -31.923          | 5.913 | 1.487      | 1.465 | 0.998        |
| BA-4000-9-5  | 4000  | 19996 | -31.039   | -26.802          | 6.012 | 1.469      | 1.462 | 0.997        |
| BA-4000-9-6  | 4000  | 23983 | -23.073   | -18.380          | 4.865 | 0.934      | 1.412 | 0.997        |
| BA-4000-9-7  | 4000  | 27973 | -24.027   | -19.748          | 5.928 | 1.242      | 1.451 | 0.996        |
| BA-4000-9-8  | 4000  | 31964 | -24.551   | -20.678          | 6.824 | 1.528      | 1.494 | 0.995        |
| BA-4500-10-1 | 4500  | 6234  | -84.428   | -76.837          | 4.451 | 1.510      | 1.371 | <b>1.004</b> |
| BA-4500-10-2 | 4500  | 9515  | -54.742   | -48.368          | 5.004 | 1.435      | 1.407 | 1.000        |
| BA-4500-10-3 | 4500  | 13624 | -36.603   | -31.536          | 4.633 | 1.146      | 1.390 | 0.997        |
| BA-4500-10-4 | 4500  | 18022 | -37.521   | -32.185          | 5.931 | 1.460      | 1.465 | 0.999        |
| BA-4500-10-5 | 4500  | 22498 | -31.249   | -26.880          | 5.974 | 1.436      | 1.456 | 0.996        |
| BA-4500-10-6 | 4500  | 26985 | -23.016   | -18.106          | 4.725 | 0.867      | 1.405 | 0.998        |
| BA-4500-10-7 | 4500  | 31475 | -24.095   | -19.567          | 5.805 | 1.154      | 1.450 | 0.996        |
| BA-4500-10-8 | 4500  | 35965 | -24.680   | -20.629          | 6.708 | 1.456      | 1.486 | 0.995        |
| BA-4500-10-9 | 4500  | 40455 | -24.864   | -21.159          | 7.366 | 1.656      | 1.516 | 0.996        |
| BA-4500-2-1  | 4500  | 6205  | -94.116   | -85.504          | 4.415 | 1.488      | 1.370 | <b>1.005</b> |
| BA-4500-3-1  | 4500  | 6198  | -88.040   | -80.075          | 4.448 | 1.504      | 1.366 | <b>1.003</b> |
| BA-4500-3-2  | 4500  | 9441  | -55.166   | -48.777          | 4.929 | 1.418      | 1.401 | 0.999        |
| BA-4500-4-1  | 4500  | 6219  | -92.900   | -83.884          | 4.400 | 1.468      | 1.372 | <b>1.005</b> |
| BA-4500-4-2  | 4500  | 9477  | -54.986   | -48.578          | 4.929 | 1.410      | 1.403 | 0.999        |
| BA-4500-4-3  | 4500  | 13598 | -43.553   | -37.879          | 5.485 | 1.429      | 1.439 | 0.999        |
| BA-4500-5-1  | 4500  | 6147  | -92.429   | -83.882          | 4.375 | 1.474      | 1.370 | <b>1.005</b> |
| BA-4500-5-2  | 4500  | 9457  | -55.154   | -48.640          | 4.898 | 1.389      | 1.406 | 0.999        |
| BA-4500-5-3  | 4500  | 13610 | -43.492   | -37.763          | 5.500 | 1.431      | 1.442 | 0.999        |
| BA-4500-5-4  | 4500  | 18010 | -37.495   | -32.144          | 5.923 | 1.455      | 1.465 | 0.999        |
| BA-4500-6-1  | 4500  | 6177  | -86.733   | -78.786          | 4.486 | 1.532      | 1.366 | <b>1.003</b> |
| BA-4500-6-2  | 4500  | 9514  | -48.630   | -42.927          | 4.526 | 1.271      | 1.376 | 0.998        |
| BA-4500-6-3  | 4500  | 13622 | -43.542   | -37.834          | 5.500 | 1.444      | 1.437 | 0.999        |
| BA-4500-6-4  | 4500  | 18003 | -37.464   | -32.161          | 5.915 | 1.460      | 1.461 | 0.998        |
| BA-4500-6-5  | 4500  | 22489 | -31.265   | -26.928          | 5.976 | 1.448      | 1.453 | 0.997        |
| BA-4500-7-1  | 4500  | 6234  | -92.063   | -83.448          | 4.417 | 1.496      | 1.373 | <b>1.004</b> |
| BA-4500-7-2  | 4500  | 9428  | -55.110   | -48.716          | 4.931 | 1.402      | 1.406 | 0.999        |
| BA-4500-7-3  | 4500  | 13610 | -36.598   | -31.520          | 4.586 | 1.142      | 1.385 | 0.997        |
| BA-4500-7-4  | 4500  | 18018 | -37.454   | -32.130          | 5.937 | 1.460      | 1.464 | 0.998        |
| BA-4500-7-5  | 4500  | 22486 | -31.358   | -27.037          | 5.964 | 1.441      | 1.453 | 0.997        |
| BA-4500-7-6  | 4500  | 26980 | -31.023   | -26.455          | 6.636 | 1.497      | 1.506 | 0.999        |
| BA-4500-8-1  | 4500  | 6096  | -85.235   | -77.540          | 4.463 | 1.538      | 1.363 | <b>1.003</b> |
| BA-4500-8-2  | 4500  | 9487  | -54.884   | -48.451          | 4.965 | 1.418      | 1.408 | 1.000        |
| BA-4500-8-3  | 4500  | 13606 | -43.534   | -37.828          | 5.490 | 1.424      | 1.442 | 0.999        |
| BA-4500-8-4  | 4500  | 18017 | -30.170   | -25.285          | 4.652 | 1.043      | 1.391 | 0.997        |
| BA-4500-8-5  | 4500  | 22489 | -31.294   | -26.937          | 5.958 | 1.441      | 1.452 | 0.997        |
| BA-4500-8-6  | 4500  | 26980 | -30.987   | -26.455          | 6.634 | 1.498      | 1.505 | 0.999        |

| Network     | Nodes | Edges | $SBICR_I$ | $SBICR_{(q,q')}$ | $d_I$ | $d_{q,q'}$ | $q$   | $q'$         |
|-------------|-------|-------|-----------|------------------|-------|------------|-------|--------------|
| BA-4500-8-7 | 4500  | 31472 | -24.113   | -19.611          | 5.809 | 1.157      | 1.450 | 0.996        |
| BA-4500-9-1 | 4500  | 6216  | -85.366   | -77.705          | 4.405 | 1.474      | 1.372 | <b>1.003</b> |
| BA-4500-9-2 | 4500  | 9466  | -54.920   | -48.549          | 4.972 | 1.417      | 1.407 | 1.000        |
| BA-4500-9-3 | 4500  | 13605 | -36.501   | -31.419          | 4.596 | 1.119      | 1.391 | 0.997        |
| BA-4500-9-4 | 4500  | 18021 | -30.164   | -25.216          | 4.632 | 1.038      | 1.392 | 0.997        |
| BA-4500-9-5 | 4500  | 22493 | -31.322   | -26.989          | 5.971 | 1.447      | 1.453 | 0.997        |
| BA-4500-9-6 | 4500  | 26985 | -23.009   | -18.136          | 4.704 | 0.867      | 1.404 | 0.998        |
| BA-4500-9-7 | 4500  | 31473 | -24.098   | -19.589          | 5.802 | 1.158      | 1.447 | 0.996        |
| BA-4500-9-8 | 4500  | 35964 | -24.667   | -20.645          | 6.738 | 1.471      | 1.486 | 0.995        |

### Song, Havlin, and Makse networks

The Song, Havlin, and Makse (SHM) model generated 211 networks, as listed in Table S2. The parameters of the model were the number of generations (G), the initial nodes (M), the inner box connections rate (IB), the between-box connection rate (BB), and the mode (MODE), for which a value of 1 denotes assortativity and a value of 2 denotes hub repulsion. The network name is given following the pattern SHM\_G-g M-m IB-*ib* BB-*bb* MODE-*bb*; for example, SHM\_G-4 M-3 IB-0.40 BB-0.20 MODE-2 means that an iterative process was repeated four times (G-4), starting with 3 nodes (M-3). The nodes that belong to each box are connected with a ratio of 0.4 (IB-0.40) and the connection between boxes is 0.20 (BB-0.20), following a hub repulsion strategy.

**Table S2.** The  $SBICR$ ,  $d_I$ ,  $d_{q,q'}$ ,  $q$ , and  $q'$  values for the information model Eq. (10) and the fractional ( $q$ ,  $q'$ ) information model Eq. (12) on SHM networks.

| Network                            | Nodes | Edges | $SBICR_I$ | $SBICR_{(q,q')}$ | $d_I$ | $d_{q,q'}$ | $q$   | $q'$  |
|------------------------------------|-------|-------|-----------|------------------|-------|------------|-------|-------|
| SHM_G-2 M-2 IB-0.00 BB-0.00 MODE-1 | 14    | 13    | -1.597    | -1.575           | 1.589 | 1.501      | 1.167 | 0.890 |
| SHM_G-2 M-2 IB-0.00 BB-0.00 MODE-2 | 10    | 9     | 5.505     | 5.206            | 1.158 | 1.052      | 1.184 | 0.928 |
| SHM_G-2 M-2 IB-0.00 BB-0.20 MODE-1 | 18    | 25    | 8.671     | 10.959           | 2.545 | 2.290      | 1.233 | 0.864 |
| SHM_G-2 M-2 IB-0.00 BB-0.20 MODE-2 | 14    | 18    | 4.048     | 2.984            | 1.866 | 1.633      | 1.222 | 0.906 |
| SHM_G-2 M-2 IB-0.00 BB-0.40 MODE-1 | 18    | 31    | -2.279    | 2.189            | 2.195 | 1.686      | 1.333 | 0.907 |
| SHM_G-2 M-2 IB-0.00 BB-0.40 MODE-2 | 10    | 15    | 0.773     | 0.776            | 1.316 | 1.285      | 1.200 | 0.841 |
| SHM_G-2 M-2 IB-0.00 BB-0.80 MODE-1 | 22    | 48    | -2.576    | -3.698           | 3.313 | 2.432      | 1.326 | 0.940 |
| SHM_G-2 M-2 IB-0.00 BB-0.80 MODE-2 | 16    | 28    | 3.618     | 3.039            | 2.173 | 1.874      | 1.280 | 0.860 |
| SHM_G-2 M-2 IB-0.00 BB-1.00 MODE-1 | 22    | 53    | 1.220     | -0.913           | 2.609 | 1.859      | 1.412 | 0.882 |
| SHM_G-2 M-2 IB-0.00 BB-1.00 MODE-2 | 18    | 31    | -2.727    | -1.025           | 2.215 | 1.760      | 1.270 | 0.927 |
| SHM_G-2 M-2 IB-0.40 BB-0.00 MODE-1 | 14    | 13    | -1.597    | -1.575           | 1.589 | 1.501      | 1.167 | 0.890 |
| SHM_G-2 M-2 IB-0.40 BB-0.00 MODE-2 | 10    | 9     | 5.505     | 5.206            | 1.158 | 1.052      | 1.184 | 0.928 |
| SHM_G-2 M-2 IB-0.40 BB-0.20 MODE-1 | 18    | 29    | -2.563    | -1.389           | 1.657 | 1.328      | 1.333 | 0.859 |
| SHM_G-2 M-2 IB-0.40 BB-0.20 MODE-2 | 10    | 13    | -2.008    | -1.926           | 1.440 | 1.302      | 1.231 | 0.899 |
| SHM_G-2 M-2 IB-0.40 BB-0.40 MODE-1 | 18    | 35    | 0.587     | -0.465           | 2.465 | 1.864      | 1.360 | 0.903 |
| SHM_G-2 M-2 IB-0.40 BB-0.40 MODE-2 | 12    | 19    | -2.076    | -1.933           | 1.504 | 1.354      | 1.244 | 0.866 |

| Network                               | Nodes | Edges | $SBICR_l$ | $SBICR_{(q,q')}$ | $d_l$ | $d_{q,q'}$ | $q$   | $q'$  |
|---------------------------------------|-------|-------|-----------|------------------|-------|------------|-------|-------|
| SHM_G-2 M-2 IB-0.40 BB-0.80<br>MODE-1 | 22    | 58    | -4.000    | -4.538           | 2.962 | 1.964      | 1.463 | 0.938 |
| SHM_G-2 M-2 IB-0.40 BB-0.80<br>MODE-2 | 16    | 36    | -3.956    | -3.856           | 2.312 | 1.748      | 1.385 | 0.931 |
| SHM_G-2 M-2 IB-0.40 BB-1.00<br>MODE-1 | 22    | 65    | -2.360    | -3.163           | 2.598 | 1.744      | 1.463 | 0.911 |
| SHM_G-2 M-2 IB-1.00 BB-0.00<br>MODE-1 | 22    | 47    | -5.583    | -3.471           | 1.342 | 0.746      | 1.762 | 0.842 |
| SHM_G-2 M-2 IB-1.00 BB-0.00<br>MODE-2 | 14    | 27    | -5.489    | -4.773           | 0.938 | 0.705      | 1.500 | 0.868 |
| SHM_G-2 M-2 IB-1.00 BB-0.20<br>MODE-1 | 26    | 77    | -4.987    | -3.667           | 1.589 | 0.762      | 1.950 | 0.842 |
| SHM_G-2 M-2 IB-1.00 BB-0.20<br>MODE-2 | 18    | 54    | -5.312    | -4.344           | 0.831 | 0.521      | 1.740 | 0.853 |
| SHM_G-2 M-2 IB-1.00 BB-0.40<br>MODE-1 | 26    | 83    | -4.623    | -3.490           | 1.670 | 0.804      | 1.950 | 0.856 |
| SHM_G-2 M-2 IB-1.00 BB-0.40<br>MODE-2 | 14    | 33    | -5.489    | -4.773           | 0.938 | 0.705      | 1.500 | 0.868 |
| SHM_G-2 M-3 IB-0.00 BB-0.00<br>MODE-1 | 51    | 50    | -13.464   | -13.000          | 2.812 | 2.127      | 1.245 | 0.922 |
| SHM_G-2 M-3 IB-0.00 BB-0.00<br>MODE-2 | 39    | 38    | -20.097   | -19.232          | 1.770 | 1.382      | 1.255 | 0.917 |
| SHM_G-2 M-3 IB-0.00 BB-0.20<br>MODE-1 | 63    | 106   | -14.796   | -14.976          | 3.075 | 1.806      | 1.377 | 0.950 |
| SHM_G-2 M-3 IB-0.00 BB-0.20<br>MODE-2 | 42    | 65    | -3.228    | -3.006           | 2.356 | 1.631      | 1.354 | 0.891 |
| SHM_G-2 M-3 IB-0.00 BB-0.40<br>MODE-1 | 69    | 155   | -9.246    | -10.267          | 3.411 | 1.979      | 1.353 | 0.954 |
| SHM_G-2 M-3 IB-0.00 BB-0.40<br>MODE-2 | 51    | 98    | -12.403   | -13.260          | 2.864 | 1.708      | 1.378 | 0.962 |
| SHM_G-2 M-3 IB-0.00 BB-0.80<br>MODE-1 | 81    | 253   | -6.428    | -9.586           | 3.895 | 1.739      | 1.548 | 0.963 |
| SHM_G-2 M-3 IB-0.00 BB-0.80<br>MODE-2 | 57    | 150   | 2.978     | -6.159           | 3.342 | 2.004      | 1.383 | 0.932 |
| SHM_G-2 M-3 IB-0.00 BB-1.00<br>MODE-1 | 87    | 302   | -2.905    | -4.937           | 4.005 | 2.031      | 1.412 | 0.931 |
| SHM_G-2 M-3 IB-0.00 BB-1.00<br>MODE-2 | 57    | 173   | -1.383    | -7.276           | 3.413 | 1.957      | 1.396 | 0.956 |
| SHM_G-2 M-3 IB-0.40 BB-0.00<br>MODE-1 | 99    | 227   | -3.726    | -11.737          | 3.122 | 1.322      | 1.630 | 0.918 |
| SHM_G-2 M-3 IB-0.40 BB-0.00<br>MODE-2 | 69    | 150   | -21.307   | -20.474          | 2.010 | 1.004      | 1.547 | 0.944 |
| SHM_G-2 M-3 IB-0.40 BB-0.20<br>MODE-1 | 111   | 313   | -9.822    | -10.872          | 3.313 | 1.163      | 1.676 | 0.932 |
| SHM_G-2 M-3 IB-0.40 BB-0.20<br>MODE-2 | 87    | 257   | -18.304   | -18.476          | 2.700 | 1.081      | 1.680 | 0.961 |
| SHM_G-2 M-3 IB-0.40 BB-0.40<br>MODE-1 | 117   | 386   | -11.882   | -12.436          | 3.537 | 1.202      | 1.702 | 0.948 |
| SHM_G-2 M-3 IB-0.40 BB-0.40<br>MODE-2 | 90    | 300   | -11.566   | -10.903          | 2.824 | 1.098      | 1.600 | 0.948 |
| SHM_G-2 M-3 IB-0.40 BB-0.80<br>MODE-1 | 129   | 520   | -13.198   | -13.534          | 3.873 | 1.268      | 1.737 | 0.963 |
| SHM_G-2 M-3 IB-0.40 BB-0.80<br>MODE-2 | 90    | 368   | -13.109   | -12.764          | 3.371 | 1.260      | 1.731 | 0.942 |
| SHM_G-2 M-3 IB-0.40 BB-1.00<br>MODE-1 | 135   | 590   | -12.696   | -13.746          | 4.253 | 1.314      | 1.800 | 0.970 |
| SHM_G-2 M-3 IB-0.40 BB-1.00<br>MODE-2 | 102   | 413   | -14.611   | -13.941          | 3.730 | 1.364      | 1.707 | 0.967 |
| SHM_G-2 M-3 IB-1.00 BB-0.00<br>MODE-1 | 177   | 1331  | -19.647   | -8.442           | 2.172 | 0.173      | 4.246 | 0.922 |
| SHM_G-2 M-3 IB-1.00 BB-0.00<br>MODE-2 | 141   | 1082  | -19.278   | -10.168          | 1.930 | 0.212      | 3.884 | 0.931 |
| SHM_G-2 M-3 IB-1.00 BB-0.20<br>MODE-1 | 189   | 1534  | -15.465   | -7.635           | 2.386 | 0.183      | 4.505 | 0.906 |
| SHM_G-2 M-3 IB-1.00 BB-0.20<br>MODE-2 | 135   | 1092  | -15.150   | -7.148           | 1.925 | 0.209      | 3.905 | 0.898 |

| Network                               | Nodes | Edges | $SBICR_l$ | $SBICR_{(q,q')}$ | $d_l$ | $d_{q,q'}$ | $q$   | $q'$  |
|---------------------------------------|-------|-------|-----------|------------------|-------|------------|-------|-------|
| SHM_G-2 M-3 IB-1.00 BB-0.40<br>MODE-1 | 195   | 1670  | -12.289   | -4.120           | 2.447 | 0.149      | 4.394 | 0.921 |
| SHM_G-2 M-3 IB-1.00 BB-0.40<br>MODE-2 | 132   | 1108  | -11.148   | -3.435           | 1.625 | 0.127      | 3.792 | 0.897 |
| SHM_G-2 M-3 IB-1.00 BB-0.80<br>MODE-1 | 207   | 1942  | -12.008   | -4.016           | 2.584 | 0.152      | 4.760 | 0.927 |
| SHM_G-2 M-3 IB-1.00 BB-0.80<br>MODE-2 | 141   | 1237  | -11.829   | -5.104           | 2.274 | 0.235      | 4.150 | 0.898 |
| SHM_G-2 M-3 IB-1.00 BB-1.00<br>MODE-1 | 213   | 2114  | -12.880   | -5.655           | 3.020 | 0.243      | 4.880 | 0.926 |
| SHM_G-2 M-3 IB-1.00 BB-1.00<br>MODE-2 | 147   | 1432  | -12.178   | -5.987           | 2.502 | 0.313      | 4.300 | 0.934 |
| SHM_G-2 M-4 IB-0.00 BB-0.00<br>MODE-1 | 124   | 123   | -17.719   | -16.546          | 3.457 | 2.170      | 1.279 | 0.939 |
| SHM_G-2 M-4 IB-0.00 BB-0.00<br>MODE-2 | 104   | 103   | -31.858   | -29.884          | 2.383 | 1.583      | 1.290 | 0.929 |
| SHM_G-2 M-4 IB-0.00 BB-0.20<br>MODE-1 | 148   | 302   | -18.442   | -18.000          | 3.922 | 1.804      | 1.429 | 0.975 |
| SHM_G-2 M-4 IB-0.00 BB-0.20<br>MODE-2 | 116   | 212   | -22.970   | -23.005          | 2.913 | 1.392      | 1.447 | 0.969 |
| SHM_G-2 M-4 IB-0.00 BB-0.40<br>MODE-1 | 164   | 459   | -13.460   | -13.322          | 3.987 | 1.711      | 1.425 | 0.968 |
| SHM_G-2 M-4 IB-0.00 BB-0.40<br>MODE-2 | 136   | 346   | -14.376   | -16.044          | 3.760 | 1.653      | 1.467 | 0.976 |
| SHM_G-2 M-4 IB-0.00 BB-0.80<br>MODE-1 | 204   | 777   | -13.740   | -14.440          | 4.838 | 1.772      | 1.543 | 0.980 |
| SHM_G-2 M-4 IB-0.00 BB-0.80<br>MODE-2 | 164   | 549   | -15.531   | -16.922          | 4.068 | 1.513      | 1.575 | 0.985 |
| SHM_G-2 M-4 IB-0.00 BB-1.00<br>MODE-1 | 220   | 933   | -13.843   | -14.731          | 4.956 | 1.608      | 1.623 | 0.983 |
| SHM_G-2 M-4 IB-0.00 BB-1.00<br>MODE-2 | 176   | 700   | -11.190   | -13.659          | 4.619 | 1.745      | 1.534 | 0.979 |
| SHM_G-2 M-4 IB-0.40 BB-0.00<br>MODE-1 | 316   | 1338  | -16.874   | -13.680          | 3.661 | 0.925      | 1.841 | 0.969 |
| SHM_G-2 M-4 IB-0.40 BB-0.00<br>MODE-2 | 284   | 1222  | -32.598   | -29.478          | 2.722 | 0.656      | 1.956 | 0.974 |
| SHM_G-2 M-4 IB-0.40 BB-0.20<br>MODE-1 | 404   | 2025  | -21.120   | -18.275          | 4.348 | 0.832      | 2.092 | 0.966 |
| SHM_G-2 M-4 IB-0.40 BB-0.20<br>MODE-2 | 316   | 1605  | -26.783   | -23.228          | 3.549 | 0.768      | 2.015 | 0.986 |
| SHM_G-2 M-4 IB-0.40 BB-0.40<br>MODE-1 | 356   | 1818  | -15.659   | -14.719          | 4.185 | 0.933      | 1.906 | 0.975 |
| SHM_G-2 M-4 IB-0.40 BB-0.40<br>MODE-2 | 308   | 1638  | -21.892   | -18.998          | 3.887 | 0.847      | 1.954 | 0.980 |
| SHM_G-2 M-4 IB-0.40 BB-0.80<br>MODE-1 | 396   | 2489  | -14.009   | -13.785          | 4.825 | 0.948      | 2.121 | 0.985 |
| SHM_G-2 M-4 IB-0.40 BB-0.80<br>MODE-2 | 324   | 1840  | -17.707   | -15.340          | 4.394 | 0.896      | 1.972 | 0.974 |
| SHM_G-2 M-4 IB-0.40 BB-1.00<br>MODE-1 | 412   | 2476  | -15.337   | -14.688          | 4.730 | 0.901      | 2.093 | 0.983 |
| SHM_G-2 M-4 IB-0.40 BB-1.00<br>MODE-2 | 376   | 2454  | -17.972   | -15.911          | 4.858 | 0.918      | 2.063 | 0.981 |
| SHM_G-2 M-4 IB-1.00 BB-0.00<br>MODE-1 | 796   | 15855 | -22.881   | -0.380           | 2.721 | 0.028      | 9.609 | 0.966 |
| SHM_G-2 M-4 IB-1.00 BB-0.00<br>MODE-2 | 604   | 11964 | -26.024   | -1.853           | 2.133 | 0.032      | 8.441 | 0.978 |
| SHM_G-2 M-4 IB-1.00 BB-0.20<br>MODE-1 | 820   | 16838 | -18.060   | -0.777           | 2.690 | 0.034      | 9.087 | 0.923 |
| SHM_G-2 M-4 IB-1.00 BB-0.20<br>MODE-2 | 616   | 12411 | -17.583   | -1.066           | 2.450 | 0.035      | 8.428 | 0.925 |
| SHM_G-2 M-4 IB-1.00 BB-0.40<br>MODE-1 | 836   | 17298 | -18.838   | -6.289           | 3.319 | 0.080      | 9.524 | 0.947 |
| SHM_G-2 M-4 IB-1.00 BB-0.40<br>MODE-2 | 728   | 15353 | -18.463   | -4.710           | 2.950 | 0.062      | 9.503 | 0.934 |
| SHM_G-2 M-4 IB-1.00 BB-0.80<br>MODE-1 | 868   | 18663 | -14.177   | -0.687           | 3.168 | 0.034      | 9.590 | 0.929 |



| Network                               | Nodes | Edges | $SBICR_l$ | $SBICR_{(q,q')}$ | $d_l$ | $d_{q,q'}$ | $q$   | $q'$  |
|---------------------------------------|-------|-------|-----------|------------------|-------|------------|-------|-------|
| SHM_G-2 M-4 IB-1.00 BB-0.80<br>MODE-2 | 656   | 13870 | -13.584   | -0.707           | 2.601 | 0.034      | 8.987 | 0.911 |
| SHM_G-2 M-4 IB-1.00 BB-1.00<br>MODE-1 | 884   | 19238 | -14.353   | -0.990           | 3.391 | 0.038      | 9.755 | 0.938 |
| SHM_G-2 M-4 IB-1.00 BB-1.00<br>MODE-2 | 680   | 14379 | -13.723   | -0.595           | 2.762 | 0.034      | 9.294 | 0.917 |
| SHM_G-3 M-2 IB-0.00 BB-0.00<br>MODE-1 | 30    | 29    | -10.262   | -10.078          | 1.791 | 1.515      | 1.197 | 0.915 |
| SHM_G-3 M-2 IB-0.00 BB-0.00<br>MODE-2 | 14    | 13    | -0.428    | -0.128           | 1.239 | 1.061      | 1.214 | 0.943 |
| SHM_G-3 M-2 IB-0.00 BB-0.20<br>MODE-1 | 64    | 133   | -8.315    | -8.489           | 3.005 | 1.789      | 1.354 | 0.930 |
| SHM_G-3 M-2 IB-0.00 BB-0.20<br>MODE-2 | 28    | 47    | -6.335    | -6.568           | 2.592 | 2.032      | 1.219 | 0.956 |
| SHM_G-3 M-2 IB-0.00 BB-0.40<br>MODE-1 | 82    | 218   | -7.040    | -10.462          | 3.616 | 1.822      | 1.435 | 0.954 |
| SHM_G-3 M-2 IB-0.00 BB-0.40<br>MODE-2 | 24    | 52    | -6.229    | -6.154           | 2.542 | 1.967      | 1.284 | 0.925 |
| SHM_G-3 M-2 IB-0.00 BB-0.80<br>MODE-1 | 134   | 530   | -9.249    | -12.777          | 4.581 | 1.804      | 1.558 | 0.978 |
| SHM_G-3 M-2 IB-0.00 BB-0.80<br>MODE-2 | 30    | 86    | -2.597    | -3.916           | 2.660 | 1.861      | 1.356 | 0.916 |
| SHM_G-3 M-2 IB-0.00 BB-1.00<br>MODE-1 | 136   | 629   | -7.840    | -8.321           | 4.858 | 2.100      | 1.456 | 0.955 |
| SHM_G-3 M-2 IB-0.00 BB-1.00<br>MODE-2 | 32    | 100   | -0.892    | -1.156           | 2.829 | 2.186      | 1.260 | 0.907 |
| SHM_G-3 M-2 IB-0.40 BB-0.00<br>MODE-1 | 30    | 29    | -10.262   | -10.078          | 1.791 | 1.515      | 1.197 | 0.915 |
| SHM_G-3 M-2 IB-0.40 BB-0.00<br>MODE-2 | 14    | 13    | -0.403    | -0.102           | 1.239 | 1.061      | 1.214 | 0.942 |
| SHM_G-3 M-2 IB-0.40 BB-0.20<br>MODE-1 | 72    | 189   | -9.463    | -9.781           | 2.869 | 1.328      | 1.520 | 0.932 |
| SHM_G-3 M-2 IB-0.40 BB-0.20<br>MODE-2 | 22    | 40    | -8.184    | -7.984           | 1.780 | 1.384      | 1.301 | 0.919 |
| SHM_G-3 M-2 IB-0.40 BB-0.40<br>MODE-1 | 84    | 294   | -12.671   | -12.739          | 3.618 | 1.562      | 1.596 | 0.956 |
| SHM_G-3 M-2 IB-0.40 BB-0.40<br>MODE-2 | 18    | 42    | -2.854    | -2.680           | 1.940 | 1.656      | 1.233 | 0.902 |
| SHM_G-3 M-2 IB-0.40 BB-0.80<br>MODE-1 | 160   | 801   | -7.782    | -7.840           | 4.148 | 1.258      | 1.596 | 0.962 |
| SHM_G-3 M-2 IB-0.40 BB-0.80<br>MODE-2 | 22    | 70    | -5.822    | -6.102           | 2.350 | 1.679      | 1.364 | 0.942 |
| SHM_G-3 M-2 IB-0.40 BB-1.00<br>MODE-1 | 168   | 932   | -9.361    | -8.930           | 4.664 | 1.375      | 1.679 | 0.961 |
| SHM_G-3 M-2 IB-0.40 BB-1.00<br>MODE-2 | 20    | 70    | -3.976    | -3.595           | 2.144 | 1.674      | 1.341 | 0.879 |
| SHM_G-3 M-2 IB-1.00 BB-0.00<br>MODE-1 | 150   | 623   | -21.478   | -10.593          | 2.120 | 0.288      | 2.928 | 0.868 |
| SHM_G-3 M-2 IB-1.00 BB-0.00<br>MODE-2 | 46    | 173   | -16.956   | -10.073          | 1.291 | 0.456      | 2.160 | 0.873 |
| SHM_G-3 M-2 IB-1.00 BB-0.20<br>MODE-1 | 250   | 1635  | -16.598   | -7.279           | 2.490 | 0.153      | 3.552 | 0.931 |
| SHM_G-3 M-2 IB-1.00 BB-0.20<br>MODE-2 | 78    | 463   | -14.729   | -10.147          | 1.935 | 0.442      | 2.957 | 0.912 |
| SHM_G-3 M-2 IB-1.00 BB-0.40<br>MODE-1 | 278   | 2097  | -18.143   | -11.162          | 3.360 | 0.297      | 4.176 | 0.944 |
| SHM_G-3 M-2 IB-1.00 BB-0.40<br>MODE-2 | 80    | 506   | -10.823   | -5.376           | 1.740 | 0.283      | 3.030 | 0.853 |
| SHM_G-3 M-2 IB-1.00 BB-0.80<br>MODE-1 | 398   | 4030  | -13.741   | -3.722           | 3.107 | 0.102      | 4.728 | 0.943 |
| SHM_G-3 M-2 IB-1.00 BB-0.80<br>MODE-2 | 114   | 876   | -11.883   | -5.759           | 2.127 | 0.282      | 3.475 | 0.877 |
| SHM_G-3 M-2 IB-1.00 BB-1.00<br>MODE-1 | 406   | 4221  | -14.076   | -4.781           | 3.515 | 0.143      | 4.884 | 0.939 |
| SHM_G-3 M-2 IB-1.00 BB-1.00<br>MODE-2 | 134   | 1202  | -12.378   | -6.063           | 2.360 | 0.304      | 3.975 | 0.915 |

| Network                               | Nodes | Edges  | $SBICR_l$ | $SBICR_{(q,q')}$ | $d_l$ | $d_{q,q'}$ | $q$    | $q'$  |
|---------------------------------------|-------|--------|-----------|------------------|-------|------------|--------|-------|
| SHM_G-3 M-3 IB-0.00 BB-0.00<br>MODE-1 | 159   | 158    | -26.660   | -25.509          | 3.013 | 1.808      | 1.294  | 0.941 |
| SHM_G-3 M-3 IB-0.00 BB-0.00<br>MODE-2 | 87    | 86     | -35.437   | -34.104          | 2.116 | 1.500      | 1.249  | 0.941 |
| SHM_G-3 M-3 IB-0.00 BB-0.20<br>MODE-1 | 378   | 1203   | -20.969   | -20.473          | 4.760 | 1.526      | 1.550  | 0.989 |
| SHM_G-3 M-3 IB-0.00 BB-0.20<br>MODE-2 | 192   | 458    | -19.186   | -21.131          | 3.745 | 1.535      | 1.477  | 0.985 |
| SHM_G-3 M-3 IB-0.00 BB-0.40<br>MODE-1 | 636   | 2599   | -16.606   | -15.900          | 5.309 | 1.382      | 1.557  | 0.986 |
| SHM_G-3 M-3 IB-0.00 BB-0.40<br>MODE-2 | 267   | 720    | -17.615   | -18.219          | 4.208 | 1.535      | 1.496  | 0.979 |
| SHM_G-3 M-3 IB-0.00 BB-0.80<br>MODE-1 | 1050  | 6406   | -16.079   | -16.859          | 6.633 | 1.461      | 1.693  | 0.994 |
| SHM_G-3 M-3 IB-0.00 BB-0.80<br>MODE-2 | 417   | 1904   | -17.120   | -17.295          | 5.030 | 1.432      | 1.644  | 0.994 |
| SHM_G-3 M-3 IB-0.00 BB-1.00<br>MODE-1 | 1266  | 8963   | -13.286   | -16.832          | 7.020 | 1.392      | 1.751  | 0.994 |
| SHM_G-3 M-3 IB-0.00 BB-1.00<br>MODE-2 | 477   | 2090   | -17.628   | -18.779          | 5.062 | 1.365      | 1.673  | 0.992 |
| SHM_G-3 M-3 IB-0.40 BB-0.00<br>MODE-1 | 1035  | 3404   | -27.170   | -26.584          | 4.182 | 0.738      | 2.012  | 0.942 |
| SHM_G-3 M-3 IB-0.40 BB-0.00<br>MODE-2 | 549   | 2018   | -38.953   | -34.170          | 3.054 | 0.641      | 1.860  | 0.978 |
| SHM_G-3 M-3 IB-0.40 BB-0.20<br>MODE-1 | 1590  | 9064   | -25.634   | -22.107          | 5.519 | 0.704      | 2.098  | 0.988 |
| SHM_G-3 M-3 IB-0.40 BB-0.20<br>MODE-2 | 873   | 4561   | -26.431   | -20.990          | 4.040 | 0.560      | 1.994  | 0.987 |
| SHM_G-3 M-3 IB-0.40 BB-0.40<br>MODE-1 | 1929  | 14364  | -21.104   | -17.346          | 6.310 | 0.780      | 2.068  | 0.991 |
| SHM_G-3 M-3 IB-0.40 BB-0.40<br>MODE-2 | 705   | 3934   | -19.604   | -15.576          | 4.459 | 0.660      | 1.896  | 0.986 |
| SHM_G-3 M-3 IB-0.40 BB-0.80<br>MODE-1 | 2562  | 26884  | -6.882    | -8.215           | 6.186 | 0.369      | 1.999  | 0.994 |
| SHM_G-3 M-3 IB-0.40 BB-0.80<br>MODE-2 | 1032  | 8016   | -20.570   | -17.223          | 5.849 | 0.846      | 2.098  | 0.992 |
| SHM_G-3 M-3 IB-0.40 BB-1.00<br>MODE-1 | 2973  | 35526  | -9.367    | -9.681           | 7.140 | 0.522      | 2.045  | 0.994 |
| SHM_G-3 M-3 IB-0.40 BB-1.00<br>MODE-2 | 1185  | 10264  | -9.482    | -5.483           | 4.737 | 0.263      | 1.971  | 0.989 |
| SHM_G-3 M-3 IB-1.00 BB-0.00<br>MODE-1 | 7467  | 182123 | -36.522   | -1.394           | 3.937 | 0.017      | 16.103 | 0.960 |
| SHM_G-3 M-3 IB-1.00 BB-0.00<br>MODE-2 | 3255  | 79322  | -37.764   | -4.976           | 2.921 | 0.022      | 14.022 | 0.952 |
| SHM_G-3 M-3 IB-1.00 BB-0.20<br>MODE-1 | 8763  | 239323 | -22.249   | 2.112            | 4.560 | 0.010      | 15.310 | 0.971 |
| SHM_G-3 M-3 IB-1.00 BB-0.20<br>MODE-2 | 3711  | 92591  | -20.736   | 0.296            | 3.468 | 0.018      | 13.691 | 0.945 |
| SHM_G-3 M-3 IB-1.00 BB-0.40<br>MODE-1 | 9435  | 271289 | -23.283   | -8.093           | 5.662 | 0.062      | 16.238 | 0.986 |
| SHM_G-3 M-3 IB-1.00 BB-0.40<br>MODE-2 | 4311  | 121645 | -22.015   | -5.009           | 4.530 | 0.039      | 15.333 | 0.965 |
| SHM_G-3 M-3 IB-1.00 BB-0.80<br>MODE-1 | 10707 | 338945 | -16.706   | 2.183            | 4.072 | 0.007      | 15.789 | 0.976 |
| SHM_G-3 M-3 IB-1.00 BB-0.80<br>MODE-2 | 4569  | 138067 | -15.464   | 1.862            | 3.105 | 0.009      | 14.734 | 0.963 |
| SHM_G-3 M-3 IB-1.00 BB-1.00<br>MODE-1 | 11409 | 378119 | -16.744   | 2.508            | 4.314 | 0.007      | 16.302 | 0.977 |
| SHM_G-3 M-3 IB-1.00 BB-1.00<br>MODE-2 | 4905  | 147296 | -15.848   | 0.978            | 3.623 | 0.013      | 15.172 | 0.956 |
| SHM_G-3 M-4 IB-0.00 BB-0.00<br>MODE-1 | 508   | 507    | -32.227   | -29.746          | 3.685 | 1.629      | 1.351  | 0.954 |
| SHM_G-3 M-4 IB-0.00 BB-0.00<br>MODE-2 | 316   | 315    | -47.119   | -43.609          | 2.635 | 1.355      | 1.304  | 0.961 |
| SHM_G-3 M-4 IB-0.00 BB-0.20<br>MODE-1 | 1676  | 6182   | -25.878   | -23.159          | 5.778 | 1.215      | 1.651  | 0.994 |

| Network                               | Nodes | Edges  | $SBICR_l$ | $SBICR_{(q,q')}$ | $d_l$ | $d_{q,q'}$ | $q$   | $q'$         |
|---------------------------------------|-------|--------|-----------|------------------|-------|------------|-------|--------------|
| SHM_G-3 M-4 IB-0.00 BB-0.20<br>MODE-2 | 840   | 2568   | -26.670   | -25.645          | 5.031 | 1.458      | 1.550 | 0.998        |
| SHM_G-3 M-4 IB-0.00 BB-0.40<br>MODE-1 | 2688  | 13441  | -20.001   | -17.641          | 6.452 | 1.035      | 1.668 | 0.995        |
| SHM_G-3 M-4 IB-0.00 BB-0.40<br>MODE-2 | 1464  | 5623   | -20.997   | -21.235          | 5.693 | 1.317      | 1.611 | 0.996        |
| SHM_G-3 M-4 IB-0.00 BB-0.80<br>MODE-1 | 4916  | 37961  | -18.583   | -18.238          | 8.134 | 1.203      | 1.797 | 0.997        |
| SHM_G-3 M-4 IB-0.00 BB-0.80<br>MODE-2 | 2400  | 15303  | -22.209   | -21.077          | 6.647 | 1.229      | 1.786 | 0.999        |
| SHM_G-3 M-4 IB-0.00 BB-1.00<br>MODE-1 | 6020  | 53933  | -15.803   | -17.849          | 8.659 | 1.281      | 1.810 | 0.998        |
| SHM_G-3 M-4 IB-0.00 BB-1.00<br>MODE-2 | 2904  | 19528  | -23.325   | -21.385          | 6.837 | 1.176      | 1.831 | 1.000        |
| SHM_G-3 M-4 IB-0.40 BB-0.00<br>MODE-1 | 9460  | 114060 | -35.463   | -28.163          | 5.281 | 0.530      | 2.439 | 0.997        |
| SHM_G-3 M-4 IB-0.40 BB-0.00<br>MODE-2 | 5964  | 50160  | -62.531   | -47.240          | 4.340 | 0.363      | 2.676 | <b>1.010</b> |
| SHM_G-3 M-4 IB-0.40 BB-0.20<br>MODE-1 | 13576 | 148617 | -22.204   | -10.253          | 6.248 | 0.111      | 2.455 | 0.990        |
| SHM_G-3 M-4 IB-0.40 BB-0.20<br>MODE-2 | 7164  | 71415  | -31.266   | -23.016          | 5.777 | 0.434      | 2.457 | 0.997        |
| SHM_G-3 M-4 IB-0.40 BB-0.40<br>MODE-1 | 12708 | 199352 | -18.152   | -12.742          | 6.689 | 0.221      | 2.608 | 0.989        |
| SHM_G-3 M-4 IB-0.40 BB-0.40<br>MODE-2 | 8848  | 107517 | -23.527   | -12.706          | 5.658 | 0.158      | 2.439 | 0.994        |
| SHM_G-3 M-4 IB-0.40 BB-0.80<br>MODE-1 | 19968 | 374394 | -13.793   | -6.754           | 7.340 | 0.131      | 2.361 | 0.998        |
| SHM_G-3 M-4 IB-0.40 BB-0.80<br>MODE-2 | 11512 | 182388 | -25.407   | -18.201          | 7.742 | 0.564      | 2.569 | 0.998        |
| SHM_G-3 M-4 IB-0.40 BB-1.00<br>MODE-1 | 21908 | 466164 | -13.293   | -7.996           | 8.344 | 0.195      | 2.400 | 0.998        |
| SHM_G-3 M-4 IB-0.40 BB-1.00<br>MODE-2 | 10464 | 170432 | -14.850   | 0.900            | 4.829 | 0.026      | 2.315 | 0.998        |
| SHM_G-4 M-2 IB-0.00 BB-0.00<br>MODE-1 | 62    | 61     | -21.522   | -20.904          | 1.996 | 1.519      | 1.217 | 0.930        |
| SHM_G-4 M-2 IB-0.00 BB-0.00<br>MODE-2 | 18    | 17     | -5.500    | -4.768           | 1.269 | 1.045      | 1.229 | 0.949        |
| SHM_G-4 M-2 IB-0.00 BB-0.20<br>MODE-1 | 298   | 1075   | -15.932   | -15.430          | 4.637 | 1.658      | 1.461 | 0.981        |
| SHM_G-4 M-2 IB-0.00 BB-0.20<br>MODE-2 | 32    | 62     | -6.427    | -6.590           | 2.764 | 2.131      | 1.261 | 0.920        |
| SHM_G-4 M-2 IB-0.00 BB-0.40<br>MODE-1 | 488   | 2556   | -16.217   | -16.317          | 5.760 | 1.686      | 1.577 | 0.990        |
| SHM_G-4 M-2 IB-0.00 BB-0.40<br>MODE-2 | 48    | 123    | -7.726    | -10.548          | 2.828 | 1.712      | 1.387 | 0.948        |
| SHM_G-4 M-2 IB-0.00 BB-0.80<br>MODE-1 | 1286  | 11988  | -13.121   | -12.250          | 7.853 | 1.737      | 1.584 | 0.993        |
| SHM_G-4 M-2 IB-0.00 BB-0.80<br>MODE-2 | 104   | 396    | -9.354    | -11.384          | 4.217 | 1.969      | 1.471 | 0.965        |
| SHM_G-4 M-2 IB-0.00 BB-1.00<br>MODE-1 | 1638  | 22153  | -14.458   | -13.063          | 9.000 | 1.922      | 1.654 | 0.994        |
| SHM_G-4 M-2 IB-0.00 BB-1.00<br>MODE-2 | 150   | 746    | -12.866   | -12.952          | 4.739 | 1.851      | 1.542 | 0.985        |
| SHM_G-4 M-2 IB-0.40 BB-0.00<br>MODE-1 | 62    | 61     | -21.522   | -20.904          | 1.996 | 1.519      | 1.217 | 0.930        |
| SHM_G-4 M-2 IB-0.40 BB-0.00<br>MODE-2 | 18    | 17     | -5.500    | -4.768           | 1.269 | 1.045      | 1.229 | 0.949        |
| SHM_G-4 M-2 IB-0.40 BB-0.20<br>MODE-1 | 414   | 1897   | -18.143   | -16.115          | 4.719 | 1.161      | 1.673 | 0.979        |
| SHM_G-4 M-2 IB-0.40 BB-0.20<br>MODE-2 | 28    | 63     | -6.741    | -6.139           | 2.222 | 1.631      | 1.333 | 0.901        |
| SHM_G-4 M-2 IB-0.40 BB-0.40<br>MODE-1 | 808   | 5518   | -18.681   | -17.009          | 6.079 | 1.136      | 1.873 | 0.993        |
| SHM_G-4 M-2 IB-0.40 BB-0.40<br>MODE-2 | 84    | 288    | -13.284   | -14.441          | 3.335 | 1.322      | 1.678 | 0.973        |

| Network                               | Nodes | Edges  | $SBICR_l$ | $SBICR_{(q,q')}$ | $d_l$      | $d_{q,q'}$ | $q$    | $q'$         |
|---------------------------------------|-------|--------|-----------|------------------|------------|------------|--------|--------------|
| SHM_G-4 M-2 IB-0.40 BB-0.80<br>MODE-1 | 2402  | 30228  | -14.148   | -11.310          | 7.937      | 0.884      | 1.929  | 0.993        |
| SHM_G-4 M-2 IB-0.40 BB-0.80<br>MODE-2 | 112   | 538    | -12.963   | -13.039          | 4.011      | 1.398      | 1.728  | 0.980        |
| SHM_G-4 M-2 IB-0.40 BB-1.00<br>MODE-1 | 2526  | 35203  | -15.241   | -12.229          | 8.738      | 1.108      | 1.978  | 0.994        |
| SHM_G-4 M-2 IB-0.40 BB-1.00<br>MODE-2 | 260   | 1525   | -8.402    | -8.126           | 4.444      | 0.936      | 1.735  | 0.971        |
| SHM_G-4 M-2 IB-1.00 BB-0.00<br>MODE-1 | 2198  | 18031  | -38.351   | -10.273          | 3.250      | 0.098      | 6.083  | 0.891        |
| SHM_G-4 M-2 IB-1.00 BB-0.00<br>MODE-2 | 302   | 2374   | -30.929   | -9.622           | 1.852      | 0.119      | 4.214  | 0.879        |
| SHM_G-4 M-2 IB-1.00 BB-0.20<br>MODE-1 | 5622  | 83811  | -23.701   | -10.429          | 5.575      | 0.105      | 7.974  | 0.988        |
| SHM_G-4 M-2 IB-1.00 BB-0.20<br>MODE-2 | 704   | 8327   | -18.855   | -2.738           | 2.779      | 0.048      | 6.196  | 0.932        |
| SHM_G-4 M-2 IB-1.00 BB-0.40<br>MODE-1 | 7024  | 130920 | -16.301   | 1.951            | 3.647      | 0.008      | 8.292  | 0.985        |
| SHM_G-4 M-2 IB-1.00 BB-0.40<br>MODE-2 | 1010  | 13694  | -20.865   | -10.107          | 3.844      | 0.146      | 7.025  | 0.970        |
| SHM_G-4 M-2 IB-1.00 BB-0.80<br>MODE-1 | 13298 | 368306 | -17.698   | 3.145            | 5.812      | 0.005      | 10.778 | 0.993        |
| SHM_G-4 M-2 IB-1.00 BB-0.80<br>MODE-2 | 2380  | 46128  | -15.362   | 0.229            | 3.294      | 0.018      | 9.258  | 0.960        |
| SHM_G-4 M-2 IB-1.00 BB-1.00<br>MODE-1 | 16548 | 527902 | -17.969   | 1.640            | 6.732      | 0.009      | 12.227 | 0.993        |
| SHM_G-4 M-2 IB-1.00 BB-1.00<br>MODE-2 | 1422  | 24435  | -15.133   | -1.097           | 3.416      | 0.031      | 8.024  | 0.945        |
| SHM_G-4 M-3 IB-0.00 BB-0.00<br>MODE-1 | 483   | 482    | -41.155   | -38.640          | 3.237      | 1.523      | 1.336  | 0.952        |
| SHM_G-4 M-3 IB-0.00 BB-0.00<br>MODE-2 | 183   | 182    | -50.293   | -47.954          | 2.331      | 1.427      | 1.253  | 0.969        |
| SHM_G-4 M-3 IB-0.00 BB-0.20<br>MODE-1 | 4947  | 39969  | -21.665   | -19.155          | 7.693      | 1.228      | 1.705  | 0.997        |
| SHM_G-4 M-3 IB-0.00 BB-0.20<br>MODE-2 | 819   | 3264   | -22.837   | -21.373          | 5.453      | 1.619      | 1.523  | 0.996        |
| SHM_G-4 M-3 IB-0.00 BB-0.40<br>MODE-1 | 10794 | 178909 | -16.087   | -17.580          | 9.519      | 1.277      | 1.854  | 0.999        |
| SHM_G-4 M-3 IB-0.00 BB-0.40<br>MODE-2 | 1671  | 12011  | -23.832   | -21.741          | 6.529      | 1.366      | 1.726  | <b>1.001</b> |
| SHM_G-4 M-3 IB-0.00 BB-0.80<br>MODE-1 | 28869 | 880475 | -14.511   | -14.030          | 12.68<br>9 | 1.527      | 1.742  | 0.999        |
| SHM_G-4 M-3 IB-0.00 BB-0.80<br>MODE-2 | 5550  | 80645  | -13.018   | -17.345          | 8.749      | 1.420      | 1.759  | 0.999        |
| SHM_G-4 M-3 IB-0.00 BB-1.00<br>MODE-2 | 5691  | 99784  | -18.053   | -16.811          | 8.895      | 1.320      | 1.847  | 0.999        |
| SHM_G-4 M-3 IB-0.40 BB-0.00<br>MODE-1 | 4677  | 21449  | -39.283   | -38.038          | 4.533      | 0.610      | 2.056  | 0.997        |
| SHM_G-4 M-3 IB-0.40 BB-0.00<br>MODE-2 | 5859  | 29366  | -77.174   | -63.212          | 4.047      | 0.429      | 2.292  | <b>1.006</b> |
| SHM_G-4 M-3 IB-0.40 BB-0.20<br>MODE-2 | 10287 | 102665 | -31.172   | -22.943          | 6.943      | 0.526      | 2.380  | 0.998        |
| SHM_G-4 M-3 IB-0.40 BB-0.40<br>MODE-1 | 36480 | 806723 | -21.619   | -17.559          | 9.263      | 0.554      | 2.665  | 0.999        |
| SHM_G-4 M-3 IB-0.40 BB-0.40<br>MODE-2 | 16587 | 247921 | -26.382   | -18.996          | 8.046      | 0.633      | 2.393  | 0.999        |
| SHM_G-4 M-3 IB-0.40 BB-0.80<br>MODE-2 | 27234 | 639037 | -11.567   | -2.599           | 6.438      | 0.036      | 2.269  | 0.999        |
| SHM_G-4 M-4 IB-0.00 BB-0.00<br>MODE-1 | 2044  | 2043   | -47.290   | -42.607          | 4.006      | 1.249      | 1.409  | 0.963        |

## Watts and Strogatz networks

Watts and Strogatz model generated 216 networks, as listed in Table S3. The parameters of the model were the number of nodes of the resulting network ( $n$ ), average node degree ( $ad$ ), and the rewiring probability ( $\beta$ ). The network name is given following the pattern WS- $n$ - $k$ - $\beta$ ; for example, WS-2000-2-0.2 describes a network with 2000 nodes with average degree 4 ( $2*ad$ ) and  $\beta = 0.2$ .

**Table S3.** The SBICR,  $d_I$ ,  $d_{q,q'}$ ,  $q$ , and  $q'$  values for the information model Eq. (10) and the fractional ( $q, q'$ ) information model Eq. (12) on WS networks.

| Network             | Nodes | Edges | $SBICR_I$ | $SBICR_{(q,q')}$ | $d_I$ | $d_{q,q'}$ | $q$   | $q'$         |
|---------------------|-------|-------|-----------|------------------|-------|------------|-------|--------------|
| WS-2000-10-0.000000 | 2000  | 20000 | -274.952  | -93.644          | 1.009 | 0.088      | 2.834 | 0.914        |
| WS-2000-10-0.200000 | 2000  | 20000 | -23.228   | -15.180          | 5.444 | 0.359      | 3.024 | 0.987        |
| WS-2000-10-0.400000 | 2000  | 20000 | -7.380    | 3.501            | 3.676 | 0.040      | 2.233 | 0.991        |
| WS-2000-10-0.600000 | 2000  | 20000 | -13.545   | -5.790           | 4.802 | 0.189      | 1.840 | 0.988        |
| WS-2000-10-0.800000 | 2000  | 20000 | -14.677   | -9.310           | 5.553 | 0.586      | 1.575 | 0.985        |
| WS-2000-10-1.000000 | 2000  | 20000 | -14.688   | -9.986           | 5.721 | 0.766      | 1.507 | 0.985        |
| WS-2000-2-0.000000  | 2000  | 4000  | -704.019  | -541.934         | 0.958 | 0.620      | 1.305 | 0.915        |
| WS-2000-2-0.200000  | 2000  | 4000  | -76.308   | -65.854          | 3.428 | 0.768      | 1.599 | 0.996        |
| WS-2000-2-0.400000  | 2000  | 4000  | -65.271   | -56.981          | 4.022 | 1.005      | 1.523 | <b>1.004</b> |
| WS-2000-2-0.600000  | 2000  | 4000  | -53.653   | -47.343          | 3.855 | 1.040      | 1.451 | 0.995        |
| WS-2000-2-0.800000  | 2000  | 4000  | -46.389   | -40.635          | 3.405 | 0.872      | 1.409 | 0.993        |
| WS-2000-2-1.000000  | 2000  | 4000  | -46.604   | -41.103          | 3.482 | 0.924      | 1.403 | 0.993        |
| WS-2000-3-0.000000  | 2000  | 6000  | -631.257  | -518.323         | 0.967 | 0.458      | 1.475 | 0.915        |
| WS-2000-3-0.200000  | 2000  | 6000  | -53.661   | -43.937          | 3.964 | 0.616      | 1.868 | 0.996        |
| WS-2000-3-0.400000  | 2000  | 6000  | -42.082   | -35.315          | 4.355 | 0.822      | 1.657 | 0.993        |
| WS-2000-3-0.600000  | 2000  | 6000  | -36.016   | -31.059          | 4.194 | 0.944      | 1.504 | 0.992        |
| WS-2000-3-0.800000  | 2000  | 6000  | -36.131   | -31.631          | 4.438 | 1.096      | 1.473 | 0.993        |
| WS-2000-3-1.000000  | 2000  | 6000  | -36.049   | -31.680          | 4.477 | 1.137      | 1.458 | 0.994        |
| WS-2000-4-0.000000  | 2000  | 8000  | -539.347  | -429.480         | 0.975 | 0.343      | 1.652 | 0.915        |
| WS-2000-4-0.200000  | 2000  | 8000  | -41.750   | -32.582          | 4.187 | 0.504      | 2.062 | 0.992        |
| WS-2000-4-0.400000  | 2000  | 8000  | -28.397   | -20.063          | 3.705 | 0.352      | 1.739 | 0.988        |
| WS-2000-4-0.600000  | 2000  | 8000  | -30.082   | -25.160          | 4.736 | 0.947      | 1.575 | 0.990        |
| WS-2000-4-0.800000  | 2000  | 8000  | -30.421   | -26.317          | 5.057 | 1.224      | 1.506 | 0.993        |
| WS-2000-4-1.000000  | 2000  | 8000  | -30.277   | -26.269          | 5.063 | 1.254      | 1.491 | 0.992        |
| WS-2000-5-0.000000  | 2000  | 10000 | -469.027  | -345.023         | 0.982 | 0.262      | 1.837 | 0.915        |
| WS-2000-5-0.200000  | 2000  | 10000 | -35.685   | -27.555          | 4.314 | 0.425      | 2.272 | 0.991        |
| WS-2000-5-0.400000  | 2000  | 10000 | -30.234   | -24.295          | 4.994 | 0.680      | 1.954 | 0.994        |
| WS-2000-5-0.600000  | 2000  | 10000 | -20.764   | -13.312          | 3.778 | 0.329      | 1.593 | 0.991        |
| WS-2000-5-0.800000  | 2000  | 10000 | -21.823   | -16.052          | 4.236 | 0.633      | 1.485 | 0.989        |
| WS-2000-5-1.000000  | 2000  | 10000 | -22.000   | -16.586          | 4.313 | 0.722      | 1.459 | 0.989        |
| WS-2000-6-0.000000  | 2000  | 12000 | -411.972  | -278.204         | 0.988 | 0.204      | 2.026 | 0.915        |
| WS-2000-6-0.200000  | 2000  | 12000 | -29.438   | -20.383          | 4.220 | 0.316      | 2.388 | 0.986        |
| WS-2000-6-0.400000  | 2000  | 12000 | -21.041   | -11.308          | 4.089 | 0.181      | 1.967 | 0.986        |
| WS-2000-6-0.600000  | 2000  | 12000 | -23.293   | -18.010          | 5.462 | 0.830      | 1.680 | 0.984        |
| WS-2000-6-0.800000  | 2000  | 12000 | -23.887   | -19.790          | 5.895 | 1.305      | 1.555 | 0.984        |
| WS-2000-6-1.000000  | 2000  | 12000 | -23.898   | -20.104          | 5.986 | 1.429      | 1.520 | 0.987        |
| WS-2000-7-0.000000  | 2000  | 14000 | -367.800  | -217.492         | 0.992 | 0.160      | 2.223 | 0.915        |
| WS-2000-7-0.200000  | 2000  | 14000 | -29.618   | -21.756          | 4.775 | 0.401      | 2.659 | 0.993        |

| Network             | Nodes | Edges | $SBICR_l$ | $SBICR_{(q,q')}$ | $d_l$ | $d_{q,q'}$ | $q$   | $q'$  |
|---------------------|-------|-------|-----------|------------------|-------|------------|-------|-------|
| WS-2000-7-0.400000  | 2000  | 14000 | -23.079   | -16.020          | 5.335 | 0.480      | 2.106 | 0.980 |
| WS-2000-7-0.600000  | 2000  | 14000 | -24.196   | -19.863          | 6.406 | 1.173      | 1.761 | 0.991 |
| WS-2000-7-0.800000  | 2000  | 14000 | -24.204   | -20.537          | 6.613 | 1.440      | 1.619 | 0.996 |
| WS-2000-7-1.000000  | 2000  | 14000 | -24.092   | -20.690          | 6.685 | 1.543      | 1.577 | 0.996 |
| WS-2000-8-0.000000  | 2000  | 16000 | -330.431  | -168.027         | 0.998 | 0.129      | 2.423 | 0.914 |
| WS-2000-8-0.200000  | 2000  | 16000 | -20.374   | -6.658           | 3.812 | 0.069      | 2.640 | 0.983 |
| WS-2000-8-0.400000  | 2000  | 16000 | -23.876   | -18.173          | 6.132 | 0.728      | 2.227 | 0.993 |
| WS-2000-8-0.600000  | 2000  | 16000 | -10.458   | -3.415           | 3.443 | 0.126      | 1.677 | 0.994 |
| WS-2000-8-0.800000  | 2000  | 16000 | -11.673   | -6.146           | 3.839 | 0.322      | 1.492 | 0.994 |
| WS-2000-8-1.000000  | 2000  | 16000 | -11.228   | -6.483           | 3.992 | 0.410      | 1.449 | 0.994 |
| WS-2000-9-0.000000  | 2000  | 18000 | -303.146  | -137.515         | 1.004 | 0.108      | 2.626 | 0.913 |
| WS-2000-9-0.200000  | 2000  | 18000 | -22.234   | -11.441          | 4.661 | 0.170      | 2.843 | 0.977 |
| WS-2000-9-0.400000  | 2000  | 18000 | -23.616   | -17.842          | 6.203 | 0.669      | 2.353 | 0.995 |
| WS-2000-9-0.600000  | 2000  | 18000 | -12.179   | -4.366           | 4.020 | 0.136      | 1.767 | 0.992 |
| WS-2000-9-0.800000  | 2000  | 18000 | -13.432   | -7.763           | 4.664 | 0.409      | 1.539 | 0.991 |
| WS-2000-9-1.000000  | 2000  | 18000 | -13.375   | -8.370           | 4.798 | 0.536      | 1.480 | 0.991 |
| WS-3000-10-0.000000 | 3000  | 30000 | -408.918  | -165.507         | 0.994 | 0.095      | 2.723 | 0.914 |
| WS-3000-10-0.200000 | 3000  | 30000 | -22.849   | -10.770          | 4.910 | 0.135      | 2.977 | 0.980 |
| WS-3000-10-0.400000 | 3000  | 30000 | -10.813   | 10.384           | 3.352 | 0.021      | 2.212 | 0.995 |
| WS-3000-10-0.600000 | 3000  | 30000 | -11.054   | -2.406           | 3.917 | 0.076      | 1.814 | 0.995 |
| WS-3000-10-0.800000 | 3000  | 30000 | -13.289   | -6.705           | 4.521 | 0.273      | 1.560 | 0.994 |
| WS-3000-10-1.000000 | 3000  | 30000 | -13.197   | -7.598           | 4.718 | 0.403      | 1.484 | 0.994 |
| WS-3000-2-0.000000  | 3000  | 6000  | -1009.633 | -782.526         | 0.956 | 0.637      | 1.289 | 0.916 |
| WS-3000-2-0.200000  | 3000  | 6000  | -84.434   | -72.449          | 3.600 | 0.753      | 1.605 | 0.998 |
| WS-3000-2-0.400000  | 3000  | 6000  | -67.547   | -58.655          | 4.058 | 0.969      | 1.518 | 0.999 |
| WS-3000-2-0.600000  | 3000  | 6000  | -61.428   | -53.793          | 4.154 | 1.054      | 1.471 | 0.998 |
| WS-3000-2-0.800000  | 3000  | 6000  | -54.972   | -48.274          | 3.886 | 0.994      | 1.432 | 0.995 |
| WS-3000-2-1.000000  | 3000  | 6000  | -54.804   | -48.290          | 3.954 | 1.026      | 1.429 | 0.996 |
| WS-3000-3-0.000000  | 3000  | 9000  | -915.908  | -772.541         | 0.963 | 0.475      | 1.448 | 0.915 |
| WS-3000-3-0.200000  | 3000  | 9000  | -55.398   | -44.642          | 3.842 | 0.529      | 1.848 | 0.995 |
| WS-3000-3-0.400000  | 3000  | 9000  | -43.266   | -36.210          | 4.167 | 0.694      | 1.644 | 0.994 |
| WS-3000-3-0.600000  | 3000  | 9000  | -43.523   | -36.989          | 4.832 | 1.046      | 1.545 | 0.995 |
| WS-3000-3-0.800000  | 3000  | 9000  | -36.623   | -31.200          | 4.153 | 0.903      | 1.456 | 0.992 |
| WS-3000-3-1.000000  | 3000  | 9000  | -36.607   | -31.369          | 4.182 | 0.946      | 1.441 | 0.993 |
| WS-3000-4-0.000000  | 3000  | 12000 | -791.548  | -655.289         | 0.969 | 0.359      | 1.615 | 0.915 |
| WS-3000-4-0.200000  | 3000  | 12000 | -43.082   | -33.685          | 4.018 | 0.418      | 2.044 | 0.993 |
| WS-3000-4-0.400000  | 3000  | 12000 | -37.144   | -30.449          | 4.737 | 0.657      | 1.814 | 0.994 |
| WS-3000-4-0.600000  | 3000  | 12000 | -29.912   | -23.068          | 4.184 | 0.597      | 1.557 | 0.990 |
| WS-3000-4-0.800000  | 3000  | 12000 | -30.583   | -25.190          | 4.604 | 0.914      | 1.489 | 0.991 |
| WS-3000-4-1.000000  | 3000  | 12000 | -30.644   | -25.608          | 4.700 | 1.012      | 1.465 | 0.991 |
| WS-3000-5-0.000000  | 3000  | 15000 | -689.401  | -535.478         | 0.974 | 0.276      | 1.787 | 0.915 |
| WS-3000-5-0.200000  | 3000  | 15000 | -36.963   | -27.855          | 4.203 | 0.378      | 2.239 | 0.992 |
| WS-3000-5-0.400000  | 3000  | 15000 | -30.976   | -23.813          | 4.819 | 0.570      | 1.901 | 0.991 |
| WS-3000-5-0.600000  | 3000  | 15000 | -31.185   | -26.156          | 5.586 | 0.967      | 1.686 | 0.996 |
| WS-3000-5-0.800000  | 3000  | 15000 | -20.896   | -13.380          | 3.465 | 0.335      | 1.467 | 0.995 |
| WS-3000-5-1.000000  | 3000  | 15000 | -31.012   | -26.783          | 5.844 | 1.269      | 1.538 | 0.997 |

| Network             | Nodes | Edges | $SBICR_l$ | $SBICR_{(q,q')}$ | $d_l$ | $d_{q,q'}$ | $q$   | $q'$  |
|---------------------|-------|-------|-----------|------------------|-------|------------|-------|-------|
| WS-3000-6-0.000000  | 3000  | 18000 | -606.040  | -434.032         | 0.979 | 0.216      | 1.965 | 0.915 |
| WS-3000-6-0.200000  | 3000  | 18000 | -29.171   | -16.177          | 3.783 | 0.137      | 2.375 | 0.987 |
| WS-3000-6-0.400000  | 3000  | 18000 | -18.574   | -5.693           | 3.303 | 0.056      | 1.957 | 0.993 |
| WS-3000-6-0.600000  | 3000  | 18000 | -22.510   | -14.650          | 4.601 | 0.362      | 1.683 | 0.989 |
| WS-3000-6-0.800000  | 3000  | 18000 | -23.589   | -17.938          | 5.156 | 0.805      | 1.525 | 0.987 |
| WS-3000-6-1.000000  | 3000  | 18000 | -23.603   | -18.304          | 5.226 | 0.901      | 1.493 | 0.987 |
| WS-3000-7-0.000000  | 3000  | 21000 | -543.096  | -354.468         | 0.984 | 0.172      | 2.147 | 0.915 |
| WS-3000-7-0.200000  | 3000  | 21000 | -30.864   | -21.784          | 4.711 | 0.363      | 2.596 | 0.992 |
| WS-3000-7-0.400000  | 3000  | 21000 | -22.251   | -11.711          | 4.621 | 0.176      | 2.094 | 0.985 |
| WS-3000-7-0.600000  | 3000  | 21000 | -24.364   | -18.811          | 6.109 | 0.878      | 1.771 | 0.983 |
| WS-3000-7-0.800000  | 3000  | 21000 | -24.881   | -20.734          | 6.584 | 1.412      | 1.577 | 0.991 |
| WS-3000-7-1.000000  | 3000  | 21000 | -24.853   | -20.941          | 6.638 | 1.513      | 1.543 | 0.992 |
| WS-3000-8-0.000000  | 3000  | 24000 | -490.301  | -281.116         | 0.987 | 0.139      | 2.335 | 0.915 |
| WS-3000-8-0.200000  | 3000  | 24000 | -30.238   | -21.636          | 5.066 | 0.361      | 2.828 | 0.994 |
| WS-3000-8-0.400000  | 3000  | 24000 | -24.019   | -16.624          | 5.858 | 0.494      | 2.226 | 0.982 |
| WS-3000-8-0.600000  | 3000  | 24000 | -24.912   | -19.978          | 6.782 | 1.055      | 1.838 | 0.997 |
| WS-3000-8-0.800000  | 3000  | 24000 | -24.895   | -20.860          | 7.004 | 1.390      | 1.640 | 0.998 |
| WS-3000-8-1.000000  | 3000  | 24000 | -24.779   | -21.060          | 7.080 | 1.511      | 1.588 | 0.998 |
| WS-3000-9-0.000000  | 3000  | 27000 | -444.903  | -220.929         | 0.991 | 0.114      | 2.525 | 0.915 |
| WS-3000-9-0.200000  | 3000  | 27000 | -21.096   | -5.269           | 3.979 | 0.049      | 2.786 | 0.985 |
| WS-3000-9-0.400000  | 3000  | 27000 | -24.522   | -18.085          | 6.403 | 0.654      | 2.354 | 0.993 |
| WS-3000-9-0.600000  | 3000  | 27000 | -24.633   | -19.591          | 6.874 | 0.957      | 1.937 | 0.997 |
| WS-3000-9-0.800000  | 3000  | 27000 | -11.344   | -5.219           | 3.830 | 0.232      | 1.512 | 0.996 |
| WS-3000-9-1.000000  | 3000  | 27000 | -10.957   | -5.737           | 3.989 | 0.317      | 1.458 | 0.996 |
| WS-3500-10-0.000000 | 3500  | 35000 | -473.748  | -204.444         | 0.990 | 0.098      | 2.680 | 0.915 |
| WS-3500-10-0.200000 | 3500  | 35000 | -22.253   | -7.446           | 4.529 | 0.069      | 2.966 | 0.983 |
| WS-3500-10-0.400000 | 3500  | 35000 | -24.695   | -18.025          | 6.612 | 0.617      | 2.451 | 0.997 |
| WS-3500-10-0.600000 | 3500  | 35000 | -10.508   | -1.707           | 3.699 | 0.062      | 1.791 | 0.996 |
| WS-3500-10-0.800000 | 3500  | 35000 | -12.369   | -5.656           | 4.201 | 0.219      | 1.548 | 0.996 |
| WS-3500-10-1.000000 | 3500  | 35000 | -12.185   | -6.453           | 4.378 | 0.319      | 1.480 | 0.996 |
| WS-3500-2-0.000000  | 3500  | 7000  | -1156.250 | -896.088         | 0.956 | 0.644      | 1.283 | 0.916 |
| WS-3500-2-0.200000  | 3500  | 7000  | -85.427   | -73.010          | 3.584 | 0.727      | 1.598 | 0.997 |
| WS-3500-2-0.400000  | 3500  | 7000  | -68.432   | -59.220          | 4.001 | 0.924      | 1.512 | 0.998 |
| WS-3500-2-0.600000  | 3500  | 7000  | -62.180   | -54.341          | 4.175 | 1.043      | 1.465 | 0.998 |
| WS-3500-2-0.800000  | 3500  | 7000  | -55.398   | -48.446          | 3.819 | 0.934      | 1.428 | 0.995 |
| WS-3500-2-1.000000  | 3500  | 7000  | -55.398   | -48.613          | 3.885 | 0.978      | 1.421 | 0.996 |
| WS-3500-3-0.000000  | 3500  | 10500 | -1053.792 | -907.496         | 0.963 | 0.483      | 1.438 | 0.915 |
| WS-3500-3-0.200000  | 3500  | 10500 | -55.926   | -44.769          | 3.839 | 0.507      | 1.839 | 0.995 |
| WS-3500-3-0.400000  | 3500  | 10500 | -43.634   | -36.317          | 4.091 | 0.649      | 1.637 | 0.994 |
| WS-3500-3-0.600000  | 3500  | 10500 | -43.967   | -37.275          | 4.791 | 0.995      | 1.543 | 0.996 |
| WS-3500-3-0.800000  | 3500  | 10500 | -36.584   | -30.476          | 3.979 | 0.771      | 1.458 | 0.993 |
| WS-3500-3-1.000000  | 3500  | 10500 | -43.870   | -37.725          | 5.063 | 1.202      | 1.492 | 0.996 |
| WS-3500-4-0.000000  | 3500  | 14000 | -915.242  | -772.501         | 0.967 | 0.366      | 1.601 | 0.915 |
| WS-3500-4-0.200000  | 3500  | 14000 | -43.556   | -33.663          | 3.870 | 0.374      | 2.047 | 0.994 |
| WS-3500-4-0.400000  | 3500  | 14000 | -37.696   | -30.773          | 4.676 | 0.638      | 1.801 | 0.995 |
| WS-3500-4-0.600000  | 3500  | 14000 | -37.524   | -31.282          | 5.420 | 0.991      | 1.626 | 0.995 |

| Network             | Nodes | Edges | $SBICR_l$ | $SBICR_{(q,q')}$ | $d_l$ | $d_{q,q'}$ | $q$   | $q'$  |
|---------------------|-------|-------|-----------|------------------|-------|------------|-------|-------|
| WS-3500-4-0.800000  | 3500  | 14000 | -30.563   | -24.564          | 4.420 | 0.785      | 1.485 | 0.992 |
| WS-3500-4-1.000000  | 3500  | 14000 | -30.530   | -24.824          | 4.462 | 0.851      | 1.462 | 0.991 |
| WS-3500-5-0.000000  | 3500  | 17500 | -797.200  | -631.765         | 0.972 | 0.282      | 1.770 | 0.915 |
| WS-3500-5-0.200000  | 3500  | 17500 | -37.353   | -27.609          | 4.131 | 0.347      | 2.240 | 0.993 |
| WS-3500-5-0.400000  | 3500  | 17500 | -30.991   | -23.075          | 4.712 | 0.489      | 1.893 | 0.989 |
| WS-3500-5-0.600000  | 3500  | 17500 | -31.655   | -26.446          | 5.591 | 0.975      | 1.672 | 0.996 |
| WS-3500-5-0.800000  | 3500  | 17500 | -31.544   | -27.000          | 5.813 | 1.187      | 1.562 | 0.997 |
| WS-3500-5-1.000000  | 3500  | 17500 | -31.487   | -27.117          | 5.826 | 1.255      | 1.532 | 0.997 |
| WS-3500-6-0.000000  | 3500  | 21000 | -702.599  | -517.709         | 0.977 | 0.222      | 1.942 | 0.915 |
| WS-3500-6-0.200000  | 3500  | 21000 | -28.878   | -13.738          | 3.600 | 0.088      | 2.377 | 0.989 |
| WS-3500-6-0.400000  | 3500  | 21000 | -31.222   | -24.495          | 5.475 | 0.614      | 2.066 | 0.996 |
| WS-3500-6-0.600000  | 3500  | 21000 | -22.033   | -13.335          | 4.311 | 0.267      | 1.664 | 0.992 |
| WS-3500-6-0.800000  | 3500  | 21000 | -23.367   | -16.842          | 4.798 | 0.606      | 1.524 | 0.989 |
| WS-3500-6-1.000000  | 3500  | 21000 | -23.469   | -17.454          | 4.881 | 0.712      | 1.488 | 0.990 |
| WS-3500-7-0.000000  | 3500  | 24500 | -626.937  | -415.229         | 0.981 | 0.176      | 2.120 | 0.915 |
| WS-3500-7-0.200000  | 3500  | 24500 | -31.167   | -21.765          | 4.771 | 0.353      | 2.569 | 0.991 |
| WS-3500-7-0.400000  | 3500  | 24500 | -21.594   | -9.470           | 4.260 | 0.104      | 2.083 | 0.990 |
| WS-3500-7-0.600000  | 3500  | 24500 | -24.228   | -17.932          | 5.866 | 0.704      | 1.750 | 0.984 |
| WS-3500-7-0.800000  | 3500  | 24500 | -24.940   | -20.348          | 6.391 | 1.277      | 1.576 | 0.986 |
| WS-3500-7-1.000000  | 3500  | 24500 | -24.901   | -20.665          | 6.473 | 1.414      | 1.530 | 0.987 |
| WS-3500-8-0.000000  | 3500  | 28000 | -566.089  | -335.557         | 0.984 | 0.143      | 2.303 | 0.915 |
| WS-3500-8-0.200000  | 3500  | 28000 | -17.186   | 2.736            | 2.929 | 0.015      | 2.592 | 0.993 |
| WS-3500-8-0.400000  | 3500  | 28000 | -23.741   | -14.896          | 5.540 | 0.330      | 2.212 | 0.982 |
| WS-3500-8-0.600000  | 3500  | 28000 | -25.096   | -19.995          | 6.825 | 1.042      | 1.828 | 0.994 |
| WS-3500-8-0.800000  | 3500  | 28000 | -25.258   | -21.066          | 7.052 | 1.411      | 1.628 | 0.997 |
| WS-3500-8-1.000000  | 3500  | 28000 | -25.183   | -21.300          | 7.131 | 1.538      | 1.575 | 0.998 |
| WS-3500-9-0.000000  | 3500  | 31500 | -516.414  | -269.465         | 0.988 | 0.118      | 2.489 | 0.915 |
| WS-3500-9-0.200000  | 3500  | 31500 | -20.006   | -1.991           | 3.621 | 0.027      | 2.777 | 0.990 |
| WS-3500-9-0.400000  | 3500  | 31500 | -24.698   | -17.945          | 6.430 | 0.619      | 2.345 | 0.991 |
| WS-3500-9-0.600000  | 3500  | 31500 | -9.150    | -1.245           | 3.332 | 0.063      | 1.725 | 0.997 |
| WS-3500-9-0.800000  | 3500  | 31500 | -24.894   | -20.768          | 7.232 | 1.320      | 1.677 | 0.998 |
| WS-3500-9-1.000000  | 3500  | 31500 | -8.609    | -4.207           | 3.709 | 0.265      | 1.451 | 0.997 |
| WS-4000-10-0.000000 | 4000  | 40000 | -538.352  | -243.745         | 0.988 | 0.100      | 2.644 | 0.915 |
| WS-4000-10-0.200000 | 4000  | 40000 | -21.928   | -5.379           | 4.293 | 0.045      | 2.968 | 0.987 |
| WS-4000-10-0.400000 | 4000  | 40000 | -24.957   | -18.100          | 6.672 | 0.615      | 2.445 | 0.996 |
| WS-4000-10-0.600000 | 4000  | 40000 | -9.731    | -0.976           | 3.564 | 0.052      | 1.784 | 0.997 |
| WS-4000-10-0.800000 | 4000  | 40000 | -11.436   | -4.715           | 3.940 | 0.183      | 1.538 | 0.997 |
| WS-4000-10-1.000000 | 4000  | 40000 | -11.031   | -5.433           | 4.120 | 0.269      | 1.474 | 0.997 |
| WS-4000-2-0.000000  | 4000  | 8000  | -1299.311 | -1008.791        | 0.955 | 0.649      | 1.278 | 0.916 |
| WS-4000-2-0.200000  | 4000  | 8000  | -86.202   | -73.237          | 3.638 | 0.719      | 1.597 | 0.997 |
| WS-4000-2-0.400000  | 4000  | 8000  | -68.898   | -59.507          | 4.014 | 0.906      | 1.508 | 0.998 |
| WS-4000-2-0.600000  | 4000  | 8000  | -62.516   | -54.632          | 4.153 | 1.008      | 1.463 | 0.998 |
| WS-4000-2-0.800000  | 4000  | 8000  | -55.692   | -48.508          | 3.767 | 0.887      | 1.425 | 0.996 |
| WS-4000-2-1.000000  | 4000  | 8000  | -55.781   | -48.757          | 3.814 | 0.925      | 1.419 | 0.996 |
| WS-4000-3-0.000000  | 4000  | 12000 | -1195.840 | -1028.042        | 0.961 | 0.487      | 1.431 | 0.916 |
| WS-4000-3-0.200000  | 4000  | 12000 | -56.574   | -45.198          | 3.866 | 0.497      | 1.836 | 0.995 |



| Network            | Nodes | Edges | $SBICR_l$ | $SBICR_{(q,q')}$ | $d_l$ | $d_{q,q'}$ | $q$   | $q'$  |
|--------------------|-------|-------|-----------|------------------|-------|------------|-------|-------|
| WS-4000-3-0.400000 | 4000  | 12000 | -43.965   | -36.374          | 3.991 | 0.607      | 1.628 | 0.995 |
| WS-4000-3-0.600000 | 4000  | 12000 | -44.244   | -37.548          | 4.725 | 0.939      | 1.542 | 0.996 |
| WS-4000-3-0.800000 | 4000  | 12000 | -36.499   | -29.843          | 3.837 | 0.682      | 1.452 | 0.994 |
| WS-4000-3-1.000000 | 4000  | 12000 | -36.544   | -30.219          | 3.882 | 0.737      | 1.434 | 0.994 |
| WS-4000-4-0.000000 | 4000  | 16000 | -1035.037 | -882.119         | 0.966 | 0.372      | 1.590 | 0.916 |
| WS-4000-4-0.200000 | 4000  | 16000 | -43.875   | -33.771          | 3.890 | 0.366      | 2.031 | 0.993 |
| WS-4000-4-0.400000 | 4000  | 16000 | -38.088   | -30.865          | 4.621 | 0.613      | 1.799 | 0.995 |
| WS-4000-4-0.600000 | 4000  | 16000 | -29.399   | -21.055          | 3.791 | 0.399      | 1.540 | 0.993 |
| WS-4000-4-0.800000 | 4000  | 16000 | -30.326   | -23.630          | 4.179 | 0.653      | 1.476 | 0.992 |
| WS-4000-4-1.000000 | 4000  | 16000 | -30.326   | -24.063          | 4.273 | 0.727      | 1.457 | 0.993 |
| WS-4000-5-0.000000 | 4000  | 20000 | -903.676  | -728.181         | 0.970 | 0.287      | 1.755 | 0.915 |
| WS-4000-5-0.200000 | 4000  | 20000 | -37.528   | -26.953          | 4.023 | 0.305      | 2.217 | 0.991 |
| WS-4000-5-0.400000 | 4000  | 20000 | -30.941   | -22.054          | 4.541 | 0.392      | 1.887 | 0.990 |
| WS-4000-5-0.600000 | 4000  | 20000 | -32.034   | -26.574          | 5.551 | 0.959      | 1.663 | 0.995 |
| WS-4000-5-0.800000 | 4000  | 20000 | -31.941   | -27.261          | 5.799 | 1.184      | 1.553 | 0.997 |
| WS-4000-5-1.000000 | 4000  | 20000 | -31.909   | -27.414          | 5.835 | 1.252      | 1.526 | 0.997 |
| WS-4000-6-0.000000 | 4000  | 24000 | -798.640  | -600.849         | 0.974 | 0.226      | 1.924 | 0.915 |
| WS-4000-6-0.200000 | 4000  | 24000 | -28.448   | -11.446          | 3.402 | 0.057      | 2.365 | 0.991 |
| WS-4000-6-0.400000 | 4000  | 24000 | -31.685   | -24.682          | 5.477 | 0.612      | 2.059 | 0.996 |
| WS-4000-6-0.600000 | 4000  | 24000 | -21.598   | -12.112          | 4.043 | 0.200      | 1.660 | 0.994 |
| WS-4000-6-0.800000 | 4000  | 24000 | -23.077   | -15.931          | 4.508 | 0.482      | 1.513 | 0.992 |
| WS-4000-6-1.000000 | 4000  | 24000 | -23.257   | -16.672          | 4.597 | 0.585      | 1.476 | 0.992 |
| WS-4000-7-0.000000 | 4000  | 28000 | -713.025  | -485.458         | 0.978 | 0.180      | 2.099 | 0.915 |
| WS-4000-7-0.200000 | 4000  | 28000 | -30.971   | -19.929          | 4.522 | 0.246      | 2.566 | 0.989 |
| WS-4000-7-0.400000 | 4000  | 28000 | -20.862   | -7.498           | 4.004 | 0.068      | 2.080 | 0.992 |
| WS-4000-7-0.600000 | 4000  | 28000 | -24.021   | -16.919          | 5.608 | 0.549      | 1.747 | 0.985 |
| WS-4000-7-0.800000 | 4000  | 28000 | -24.833   | -19.732          | 6.146 | 1.100      | 1.569 | 0.985 |
| WS-4000-7-1.000000 | 4000  | 28000 | -24.857   | -20.072          | 6.213 | 1.213      | 1.532 | 0.985 |
| WS-4000-8-0.000000 | 4000  | 32000 | -642.994  | -389.144         | 0.982 | 0.146      | 2.277 | 0.915 |
| WS-4000-8-0.200000 | 4000  | 32000 | -31.328   | -22.101          | 5.092 | 0.365      | 2.769 | 0.995 |
| WS-4000-8-0.400000 | 4000  | 32000 | -23.389   | -13.109          | 5.253 | 0.215      | 2.226 | 0.985 |
| WS-4000-8-0.600000 | 4000  | 32000 | -25.191   | -19.748          | 6.761 | 0.970      | 1.831 | 0.991 |
| WS-4000-8-0.800000 | 4000  | 32000 | -25.526   | -21.202          | 7.088 | 1.417      | 1.616 | 0.997 |
| WS-4000-8-1.000000 | 4000  | 32000 | -25.427   | -21.415          | 7.149 | 1.540      | 1.566 | 0.997 |
| WS-4000-9-0.000000 | 4000  | 36000 | -588.018  | -317.992         | 0.985 | 0.121      | 2.459 | 0.915 |
| WS-4000-9-0.200000 | 4000  | 36000 | -19.247   | 0.413            | 3.387 | 0.018      | 2.784 | 0.992 |
| WS-4000-9-0.400000 | 4000  | 36000 | -24.634   | -17.172          | 6.284 | 0.519      | 2.351 | 0.985 |
| WS-4000-9-0.600000 | 4000  | 36000 | -25.304   | -20.013          | 7.079 | 0.994      | 1.896 | 0.998 |
| WS-4000-9-0.800000 | 4000  | 36000 | -7.243    | -2.677           | 3.382 | 0.165      | 1.500 | 0.998 |
| WS-4000-9-1.000000 | 4000  | 36000 | -25.134   | -21.185          | 7.363 | 1.456      | 1.611 | 0.999 |

**Table S4.** Mann-Whitney U test using adjusted alpha  $\alpha = 3.333\text{e-}04$  for  $d_{\ell}$ . \* Means statistical difference.

| i \ j | BA                                                | SHM                                                 |
|-------|---------------------------------------------------|-----------------------------------------------------|
| BA    | --                                                | --                                                  |
| SHM   | U(Ni=216, Nj=225)=11113.332, z=9.925, p=3.232e-23 | --                                                  |
| WS    | U(Ni=216, Nj=225)=14229.951, z=7.617, p=2.606e-14 | *U(Ni=216, Nj=216)=19138.193, z=-3.422, p=6.208e-04 |

**Table S5.** Mann-Whitney U test using adjusted alpha  $\alpha = 3.333\text{e-}04$  for  $d_{(q,q')}$ .

| i \ j | BA                                                | SHM                                               |
|-------|---------------------------------------------------|---------------------------------------------------|
| BA    | --                                                | --                                                |
| SHM   | U(Ni=216, Nj=225)=16791.348, z=5.731, p=9.996e-09 | --                                                |
| WS    | U(Ni=216, Nj=225)=2580.340, z=16.276, p=1.460e-59 | U(Ni=216, Nj=216)=16041.450, z=5.734, p=9.780e-09 |
